# Supplementary material for: Knowledge attitude, and practice of patients with knee osteoarthritis towards perioperative functional exercise after total knee arthroplasty: a cross-sectional study
Source: PeerJ. 2025 Jun 4;13:e19511. doi: 10.7717/peerj.19511 (PMC12145091; doi:10.7717/peerj.19511)
Supplement: Supplemental Information 1 [file peerj-13-19511-s001.xls]

## Sheet: Sheet1
Number	Tmes	Genders	Ages	Residence Type	Education Level	Occupation:	Income	Marital Status	Underlying disease	Type of Medical Insurance	When were you diagnosed with knee osteoarthritis	Have you undergone total knee	K1	K2	K3	K4	K5	K6	K7	K8	K9	A1	A2	A3	A4	A5	A6	TSK1	TSK2	TSK3	TSK4	TSK5	TSK6	TSK7	TSK8	TSK9	TSK10	TSK11	TSK12	TSK13	TSK14	TSK15	TSK16	TSK17	P1	P2	P3	P4	P5
1	670	2	80	2	2	10	3	2	2	1	5	1	2	2	1	1	1	1	1	1	2	1	4	2	3	3	2	2	2	2	2	2	3	3	3	2	2	2	3	3	2	2	3	3	1	1	1	4	1
2	357	2	80	2	1	10	2	2	2	1	2	1	2	1	1	1	2	2	1	2	2	1	2	1	1	4	2	1	1	4	2	1	3	1	1	1	1	3	2	3	1	1	1	2	1	1	1	5	1
3	363	2	78	2	2	10	3	2	2	1	4	1	1	1	1	1	1	2	2	1	2	1	3	1	1	2	1	2	2	2	3	2	3	3	3	3	3	3	3	3	2	2	3	3	1	2	1	3	2
4	326	2	34	2	3	1	4	2	5	1	1	2	1	1	1	1	1	1	1	1	2	1	5	1	5	5	1	1	1	1	1	1	1	1	2	1	1	1	1	4	1	4	1	1	1	1	1	5	1
5	141	2	45	1	1	1	2	2	5	1	1	2	3	3	3	3	3	2	2	3	2	2	2	2	2	2	2	3	3	3	3	2	3	3	3	3	3	3	3	3	3	3	3	3	3	2	2	3	2
6	419	2	30	1	3	1	2	2	5	1	1	2	2	2	2	2	1	3	1	2	2	3	3	3	3	3	3	4	2	2	4	4	4	4	4	3	3	3	3	3	3	2	3	3	3	5	3	4	5
7	283	1	66	1	1	10	1	2	5	3	1	1	1	1	1	1	1	1	1	1	2	2	2	2	2	2	2	2	1	1	1	1	4	4	4	4	4	4	4	2	2	2	2	2	1	1	1	5	1
8	550	2	66	2	2	1	4	2	1	1	3	2	2	2	2	2	2	2	2	2	2	3	2	1	2	2	2	3	2	2	2	2	3	3	3	2	2	1	3	3	2	3	2	3	2	2	1	2	1
9	172	2	51	2	3	1	3	2	5	1	1	2	2	2	1	1	2	2	2	2	2	2	3	2	1	3	3	2	2	2	2	2	2	2	2	2	2	2	2	2	2	2	2	2	3	3	2	3	3
10	132	2	45	2	3	1	2	2	5	1	1	2	1	1	1	1	1	1	1	1	2	1	1	1	1	1	1	4	4	4	4	4	4	4	4	4	4	4	4	4	4	4	4	4	1	1	1	1	1
11	318	2	50	2	3	1	3	2	5	2	1	2	1	1	1	1	1	1	1	1	2	1	4	1	1	1	1	2	2	3	3	2	3	3	3	3	3	3	3	3	3	2	3	3	2	2	1	4	1
12	531	2	45	2	3	1	3	2	5	3	2	2	1	1	1	1	1	1	1	1	2	1	5	1	1	1	1	1	2	4	4	2	4	2	4	3	1	4	3	2	2	1	3	3	1	2	1	5	1
13	294	2	44	2	3	1	3	2	5	1	1	2	1	1	1	1	1	1	1	1	2	1	1	1	1	1	1	2	2	2	2	2	3	3	3	3	3	3	3	3	2	2	3	2	1	1	1	1	1
14	1092	2	44	2	3	1	3	2	5	3	1	2	2	2	1	1	2	2	1	1	2	2	3	2	3	2	2	2	2	2	2	2	4	4	3	2	2	3	2	3	2	2	3	3	2	1	2	4	1
15	425	2	42	2	3	1	3	2	5	3	1	2	2	2	2	2	2	1	2	2	2	1	4	1	2	2	3	1	1	2	3	3	3	3	3	3	2	3	3	3	2	2	3	3	3	2	3	3	3
16	119	2	41	2	3	1	3	2	5	1	3	2	1	1	1	1	1	1	1	1	2	1	1	1	1	1	1	1	1	1	1	1	1	1	1	1	1	1	1	1	1	1	1	1	1	1	1	1	1
17	124	2	40	1	3	12	3	2	5	1	1	2	1	1	1	1	1	1	1	1	2	1	1	1	1	1	1	1	1	1	1	1	1	1	1	1	1	1	1	1	1	1	1	1	1	1	1	5	1
18	656	2	50	2	3	1	3	2	5	3	1	2	1	1	1	1	1	1	1	1	2	1	4	1	2	2	1	2	2	2	3	2	3	3	3	2	2	3	3	3	2	2	3	2	2	2	2	3	2
19	263	2	45	2	3	1	2	2	5	1	1	2	1	1	1	1	1	1	1	1	2	1	5	2	1	1	1	1	1	1	1	1	1	1	1	1	1	4	2	1	1	2	4	1	1	1	1	4	1
20	352	2	48	2	2	1	2	1	5	1	1	2	1	1	1	1	1	1	1	1	2	1	1	1	1	1	1	2	1	1	2	1	1	1	3	1	3	3	2	3	3	2	3	4	3	1	2	3	1
21	343	2	38	2	3	1	2	2	5	1	2	2	2	2	1	1	2	2	1	1	2	1	2	1	1	2	2	3	2	2	3	1	3	4	4	2	3	3	3	1	4	2	4	1	3	1	2	2	2
22	197	2	29	2	3	1	4	2	5	1	1	2	1	1	1	1	1	1	1	1	2	1	1	1	1	1	1	1	1	1	1	2	3	3	2	3	3	2	2	3	3	3	1	3	1	1	1	1	1
23	234	2	40	2	3	1	4	2	5	1	1	2	1	1	1	1	1	1	1	1	2	1	1	1	1	1	1	3	3	1	2	1	2	4	4	4	3	3	3	4	2	1	1	1	1	1	1	3	1
24	206	2	40	2	3	1	2	2	5	1	1	2	1	1	1	1	1	1	1	1	2	1	1	1	1	1	1	2	2	2	2	2	2	2	2	2	2	2	2	2	2	2	2	2	2	2	2	2	2
25	626	2	49	2	3	1	2	2	5	1	1	2	1	1	1	1	1	1	1	1	2	1	1	1	1	1	1	1	1	2	2	1	1	1	1	3	3	3	3	3	3	3	3	3	1	1	1	1	1
26	408	2	33	2	3	1	2	2	5	1	1	2	1	1	1	1	1	1	1	1	2	2	2	1	1	1	1	2	2	2	2	2	2	2	3	2	2	3	4	3	2	2	3	3	2	1	1	5	2
27	334	1	38	2	3	1	3	2	5	1	4	2	2	2	2	2	2	2	2	3	1	1	4	1	1	1	1	1	1	1	4	1	4	3	4	4	3	3	3	3	3	3	3	2	3	3	3	3	3
28	266	2	28	2	3	1	3	1	5	1	1	2	2	2	2	2	2	2	2	2	2	3	3	3	3	3	3	3	3	3	3	3	3	3	3	3	3	3	3	3	3	3	3	3	4	4	4	4	4
29	219	2	61	1	1	1	2	2	5	1	3	2	2	2	1	1	1	1	1	1	2	2	3	3	3	3	3	2	2	3	3	3	3	3	3	3	2	3	3	3	3	2	3	3	3	3	3	3	3
30	379	2	76	2	2	10	3	2	4	1	5	2	2	2	1	1	2	1	1	1	2	1	4	1	4	4	1	1	2	2	3	2	3	3	3	2	3	3	3	3	2	2	3	2	1	2	2	4	1
31	145	2	68	2	2	10	3	2	2	1	4	1	1	1	1	1	1	1	1	1	2	1	1	1	1	1	1	1	1	1	2	1	4	2	2	2	3	2	3	3	2	1	3	2	1	1	1	5	1
32	225	1	68	2	1	1	2	2	2	1	4	1	1	1	1	1	1	1	1	1	2	1	5	1	1	5	1	1	1	1	1	1	3	2	4	1	1	1	4	4	1	1	1	1	1	1	1	1	1
33	242	1	66	2	3	1	4	2	1	1	4	2	1	1	1	1	1	1	1	1	2	1	4	1	1	4	1	1	1	1	1	1	1	1	1	1	1	1	1	1	1	1	1	1	1	1	1	4	1
34	1182	2	71	1	1	11	1	2	5	1	5	1	2	2	1	1	1	1	1	3	2	2	2	2	2	2	2	2	2	3	2	2	2	2	3	3	2	2	2	3	3	3	2	2	2	2	1	5	1
35	296	2	68	2	1	11	2	1	5	1	3	2	3	2	2	2	2	3	2	3	2	2	2	2	2	2	2	2	2	2	2	2	2	2	2	3	3	3	3	3	2	2	3	3	3	2	2	3	2
36	240	2	65	1	1	10	1	2	5	1	5	1	1	1	1	1	1	1	1	1	2	1	5	1	5	4	1	1	1	1	1	1	1	1	4	1	1	3	3	3	1	1	3	2	1	1	1	5	1
37	129	2	58	1	1	10	3	2	1	1	5	1	1	1	1	1	1	1	1	1	2	1	1	1	1	1	1	1	4	1	4	1	1	1	1	3	3	2	2	2	2	1	1	1	1	1	1	1	1
38	312	2	70	1	1	1	1	2	5	1	3	2	1	1	1	1	1	1	1	1	2	1	5	1	1	5	1	2	2	2	4	1	3	2	3	4	4	3	4	4	2	2	2	4	1	1	1	1	1
39	618	2	69	1	1	1	1	2	5	1	1	2	3	2	2	2	3	3	2	3	2	2	1	2	2	2	2	3	3	2	3	2	4	4	3	3	3	3	3	3	2	2	3	3	2	1	1	2	2
40	1011	2	71	1	1	1	1	2	5	1	5	1	1	1	1	1	1	2	3	1	2	1	4	1	1	1	1	3	1	3	3	2	1	1	1	1	1	1	1	1	2	2	3	3	3	3	3	3	2
41	709	2	75	1	1	1	1	2	5	1	4	1	1	2	1	1	1	1	1	1	2	1	1	1	1	3	1	2	1	2	3	1	3	1	3	1	1	3	3	3	1	2	3	3	2	2	1	5	1
42	1482	2	57	1	1	12	3	2	1	3	2	2	2	1	2	1	2	1	1	1	2	1	1	1	1	1	1	2	1	1	1	1	1	1	1	1	1	1	1	1	1	1	1	1	1	1	1	1	1
43	1348	2	48	1	1	11	2	2	5	1	5	1	1	3	1	1	1	1	1	1	2	1	5	2	2	4	1	2	2	3	3	2	3	1	2	3	2	3	2	3	2	3	2	2	3	1	1	3	1
44	156	1	67	2	2	1	1	2	5	1	5	2	2	2	2	2	2	2	2	2	2	2	2	1	1	2	1	2	2	2	2	2	2	2	2	2	2	2	2	2	2	2	2	2	3	3	1	3	2
45	391	1	80	1	2	10	2	2	5	1	3	2	1	1	1	1	1	1	1	1	2	2	2	1	1	1	2	2	1	1	2	2	2	2	2	2	2	1	3	2	2	2	3	2	2	2	1	5	2
46	303	1	65	1	1	1	1	2	5	1	5	2	2	2	2	1	2	2	2	2	2	3	2	2	2	2	2	2	4	2	4	2	2	2	2	3	3	3	3	3	2	1	4	3	2	2	3	3	2
47	112	2	70	2	1	10	3	2	5	1	3	2	1	1	1	1	1	1	1	1	2	3	3	3	3	3	3	3	2	2	2	2	2	2	2	2	2	2	2	2	2	2	2	2	1	1	1	1	1
48	67	2	64	2	1	10	2	2	5	1	2	2	1	1	1	1	1	1	1	1	2	1	1	1	1	1	1	2	2	2	2	2	2	2	2	2	2	2	2	2	2	2	2	2	1	1	1	1	1
49	115	2	67	1	1	11	1	2	5	1	5	2	2	2	2	2	2	1	2	2	2	3	3	3	3	3	2	3	3	2	2	2	2	2	3	3	3	3	2	3	2	2	2	2	3	3	3	3	3
50	117	2	77	2	1	1	2	2	5	1	4	1	2	2	2	2	2	2	2	2	2	3	2	2	2	2	2	3	2	2	2	2	2	2	2	3	3	3	3	2	2	2	2	2	2	2	2	2	2
51	105	2	62	1	1	1	3	2	2	1	5	2	1	1	1	1	1	1	1	1	2	3	3	3	3	3	3	2	2	2	2	2	2	2	2	2	2	2	2	2	2	2	2	2	1	1	1	1	1
52	112	2	63	1	1	1	1	2	2	1	3	2	2	2	2	2	1	1	2	1	2	2	2	2	2	2	2	3	3	2	3	2	2	2	2	2	3	3	2	3	3	2	2	2	2	2	2	2	2
53	382	2	69	2	1	12	4	2	2	3	2	2	1	1	1	1	1	1	1	1	2	1	1	1	1	1	1	1	1	1	1	1	1	1	1	1	1	1	3	3	3	1	1	3	1	1	1	1	1
54	533	2	75	1	1	11	1	1	2	3	4	2	3	3	3	3	2	2	2	3	2	1	2	2	2	2	2	3	3	3	3	2	3	3	3	3	3	3	2	3	3	2	3	3	1	2	2	3	2
55	644	2	69	2	1	10	3	2	5	3	2	1	3	2	2	1	3	3	1	2	2	1	4	1	1	1	1	1	1	1	1	1	1	2	2	3	3	4	2	3	2	1	3	2	1	1	1	5	1
56	262	2	73	1	1	11	2	1	2	1	5	2	2	2	2	2	2	2	2	2	2	3	3	3	3	3	3	3	3	3	3	2	3	3	3	3	3	3	3	3	3	3	3	3	3	3	3	3	3
57	660	2	60	1	1	1	4	2	5	1	3	1	1	1	1	1	1	1	1	1	2	2	2	2	2	2	2	3	3	2	3	2	3	2	3	3	1	3	3	3	1	1	3	3	1	3	2	3	1
58	1782	2	67	1	1	1	1	2	2	4	4	1	3	3	2	1	1	1	1	1	2	1	1	1	1	1	1	4	3	2	3	3	3	3	3	3	3	3	3	3	3	3	3	3	3	3	2	2	3
59	194	2	72	2	1	12	1	2	5	1	3	2	2	2	2	2	2	2	2	2	2	2	2	2	2	2	2	2	2	2	2	2	2	2	2	2	2	2	2	2	2	2	2	2	3	3	3	3	3
60	212	2	67	2	1	1	2	2	2	3	5	2	2	2	2	2	2	2	2	2	2	2	2	2	2	2	2	3	3	3	3	2	3	3	3	3	2	3	3	3	3	3	3	3	2	2	2	2	2
61	635	2	69	1	1	1	3	2	5	1	3	1	2	2	2	2	1	2	1	2	2	1	3	2	2	2	2	3	3	3	3	3	3	3	3	3	3	3	3	3	3	3	3	3	2	2	2	2	2
62	371	1	75	1	1	10	2	2	2	1	4	2	2	1	1	1	2	2	2	2	2	1	1	2	2	2	2	2	2	2	3	2	2	2	3	2	2	3	3	3	2	2	2	2	2	2	2	4	2
63	246	2	55	2	3	1	3	1	5	1	2	2	1	1	1	1	1	1	1	1	1	1	4	1	3	1	1	2	2	2	3	2	2	2	3	3	2	3	3	3	2	2	3	3	1	1	1	5	1
64	274	2	59	1	1	1	2	2	5	1	2	2	2	2	1	1	1	1	1	2	1	2	2	2	2	2	2	2	2	2	2	2	2	2	2	2	2	2	2	2	2	2	2	2	2	2	2	3	2
65	557	1	64	1	2	12	3	2	2	1	5	1	1	1	1	1	1	1	1	1	2	2	4	1	1	2	1	3	3	3	2	2	3	3	3	4	3	3	3	3	2	1	3	3	2	1	1	4	1
66	300	1	67	1	1	12	3	2	5	1	4	1	1	1	1	1	1	1	1	1	2	2	4	1	2	3	1	1	1	1	1	1	1	1	1	1	1	1	1	1	1	1	1	3	1	1	1	1	1
67	231	2	70	1	1	10	3	2	2	1	5	1	1	1	1	1	1	1	1	1	2	1	4	3	3	4	1	1	1	1	1	1	1	1	1	1	1	1	1	1	1	1	1	1	1	1	1	1	1
68	393	2	72	2	2	10	2	2	2	1	3	2	2	2	2	2	1	2	2	2	2	1	2	1	2	1	1	3	3	2	2	2	3	3	3	3	2	3	3	3	2	2	3	3	1	1	2	2	1
69	904	1	73	1	1	12	1	2	2	1	3	1	1	1	1	1	1	1	1	1	2	1	3	1	3	1	1	1	1	1	3	1	2	2	1	2	2	3	3	3	2	2	3	3	2	4	1	4	1
70	578	2	70	2	2	10	3	2	2	1	4	1	1	1	1	1	1	1	1	1	2	1	5	1	1	1	1	1	1	1	1	1	1	1	1	1	1	1	4	3	1	1	3	2	1	1	1	4	1
71	273	2	64	1	1	1	2	2	5	1	1	1	1	1	1	1	1	1	1	1	2	1	1	1	1	1	1	1	1	1	1	1	1	1	1	1	1	1	1	1	1	1	1	1	1	1	1	1	1
72	743	2	73	2	3	10	3	2	2	1	5	1	1	1	1	1	1	1	1	1	2	1	1	1	1	1	1	2	2	2	3	2	3	2	3	2	2	2	3	2	2	2	3	3	2	2	2	4	1
73	1331	2	61	1	1	10	2	1	2	1	4	1	1	1	1	1	1	1	1	1	2	1	1	1	1	1	1	1	1	1	1	1	1	1	1	1	1	1	4	3	1	1	4	3	1	1	1	5	1
74	673	2	67	1	1	12	2	2	1	1	2	1	3	2	1	1	1	1	1	1	2	1	2	1	1	1	1	2	1	2	3	1	1	3	1	1	3	3	3	3	2	2	3	3	1	1	1	5	1
75	668	2	64	2	2	1	4	2	5	1	3	2	3	2	3	3	3	2	1	1	2	1	3	1	1	1	1	1	1	1	2	1	1	1	1	2	3	3	2	3	2	1	4	4	1	1	1	5	1
76	447	1	70	1	1	10	2	2	4	1	1	2	3	2	1	2	1	1	2	2	2	2	4	2	2	4	2	2	2	2	2	1	3	3	2	3	3	3	2	3	2	2	2	3	4	2	1	5	1
77	379	1	68	2	1	10	1	2	5	1	1	1	1	1	1	1	1	1	1	1	2	1	5	1	4	4	1	4	4	4	4	1	1	1	4	1	2	1	4	4	1	1	4	2	1	1	1	5	1
78	657	2	58	1	2	1	2	2	5	3	1	2	1	1	1	1	1	1	1	1	2	2	2	2	2	2	2	3	3	3	3	3	3	3	3	3	3	3	3	3	3	3	3	3	1	1	1	1	1
79	801	2	67	1	1	10	1	2	1	1	5	1	3	2	3	2	2	2	2	2	2	2	2	2	2	2	2	2	3	2	2	1	3	3	2	3	3	3	3	4	2	2	3	3	1	1	1	4	2
80	362	2	63	1	2	1	1	2	2	1	3	1	1	2	2	2	2	2	2	2	2	2	2	3	2	2	2	2	3	1	3	2	3	3	3	3	3	3	3	3	2	2	2	3	2	2	2	2	2
81	581	2	79	1	1	12	1	2	1	1	4	2	1	1	1	1	1	1	1	1	2	1	4	1	1	1	1	2	1	1	4	1	1	3	3	2	2	2	3	3	2	3	2	3	2	2	2	3	1
82	564	1	60	1	2	10	3	2	1	1	3	2	2	2	2	2	3	2	2	2	2	1	2	2	2	3	1	2	2	2	2	2	3	2	2	2	3	3	4	4	2	2	4	3	1	1	1	4	1
83	568	2	79	2	2	10	2	2	2	1	5	1	2	2	2	2	2	2	2	2	2	1	4	1	2	4	1	2	2	2	3	2	2	3	3	3	2	2	3	3	2	3	3	3	2	2	2	3	1
84	502	1	80	2	2	10	3	2	2	1	5	2	1	1	2	1	2	2	1	2	2	1	2	1	1	2	1	1	1	2	2	1	3	3	2	1	2	2	3	3	2	2	3	3	1	2	2	4	1
85	575	1	70	1	1	11	2	2	5	4	5	2	3	3	3	3	3	3	3	2	2	1	3	2	1	4	1	3	3	3	2	1	3	3	3	3	3	2	3	3	2	2	3	3	1	1	1	4	2
86	265	2	62	1	2	1	2	2	2	1	2	1	1	1	1	1	1	1	1	1	2	1	4	1	3	3	1	2	2	2	3	2	2	2	3	3	2	2	3	3	2	2	3	3	1	1	1	3	1
87	217	2	68	1	1	12	2	2	2	1	2	2	2	2	1	1	2	1	2	1	2	1	2	2	2	2	2	3	3	3	2	2	3	3	3	3	3	3	3	3	3	3	3	3	3	3	3	3	3
88	165	1	63	1	1	1	2	2	1	1	3	1	1	1	1	1	1	1	1	1	2	1	3	1	4	4	1	2	2	2	2	2	2	2	2	2	2	2	3	2	2	2	3	2	1	1	1	4	1
89	126	2	63	2	3	1	3	2	2	1	2	1	1	1	1	1	1	1	1	1	2	1	4	1	4	1	1	1	1	1	2	2	2	2	3	1	2	2	3	2	2	2	3	3	1	1	1	4	1
90	381	2	66	1	1	11	1	2	4	1	1	2	1	1	1	1	1	1	1	1	1	1	1	1	1	1	1	1	2	2	3	1	1	1	1	1	3	3	4	3	2	1	4	3	1	1	1	4	1
91	435	2	36	2	3	1	4	2	5	1	1	1	1	2	1	1	2	1	2	1	2	1	4	2	2	2	2	3	2	1	2	1	1	3	3	2	1	3	3	3	2	2	3	2	2	3	1	4	1
92	138	2	55	2	2	1	2	2	2	1	2	2	2	2	2	2	2	2	2	2	2	2	3	3	3	3	3	2	3	3	3	2	3	3	3	3	3	3	3	3	3	3	3	3	3	3	3	3	3
93	655	2	33	2	3	1	4	2	5	3	1	2	1	1	1	1	1	1	1	1	2	1	1	1	1	2	1	3	3	2	2	1	4	3	3	3	1	3	4	3	1	1	4	3	2	2	2	4	1
94	199	2	68	1	1	10	2	1	5	1	2	1	2	3	2	2	3	1	1	2	2	2	1	3	1	4	1	3	4	1	3	3	1	3	2	3	2	1	3	2	3	4	1	2	2	3	1	4	2
95	94	2	63	2	2	10	2	2	2	1	4	2	2	2	2	2	2	2	2	2	2	1	2	2	1	2	2	3	3	3	3	3	3	3	3	3	3	3	4	3	3	3	3	3	4	4	4	4	3
96	196	1	71	1	2	10	2	2	5	1	1	1	3	1	1	2	3	3	1	3	2	2	5	2	1	1	3	2	1	1	3	1	3	2	2	3	1	4	3	3	2	4	2	4	3	1	2	5	2
97	310	2	59	2	2	10	3	2	4	1	3	2	3	1	1	1	2	1	2	2	2	2	2	1	2	2	3	3	2	2	2	2	4	2	2	3	3	2	2	3	2	1	3	3	3	2	2	4	2
98	187	2	65	1	1	11	2	1	5	1	4	1	3	2	2	2	3	2	3	3	2	2	1	2	1	2	3	4	3	2	2	3	4	3	2	4	3	3	2	3	2	1	2	3	4	2	2	2	3
99	373	2	56	1	3	1	2	2	2	3	2	2	3	2	2	2	3	3	2	3	2	2	2	2	2	2	2	2	3	2	3	3	3	2	3	3	2	3	3	3	2	2	3	3	3	2	2	3	2
100	234	1	69	1	1	12	3	2	2	1	1	1	1	1	1	1	1	1	1	1	2	1	4	1	4	3	1	2	2	2	3	1	1	1	1	1	1	1	1	1	1	1	1	1	1	1	1	5	1
101	156	1	80	1	3	1	3	1	2	1	5	1	1	1	2	1	1	1	1	1	2	1	2	3	4	5	2	2	3	2	3	3	2	3	2	2	3	2	3	2	1	4	3	2	1	5	3	3	4
102	206	1	59	2	3	10	2	1	5	3	1	1	1	2	1	2	1	2	1	2	2	2	2	2	1	1	1	1	3	1	2	1	3	2	3	3	3	2	3	3	2	2	1	4	3	1	2	4	1
103	237	2	35	2	3	1	3	2	5	3	1	2	1	1	1	1	1	1	1	1	2	1	5	1	1	5	1	1	1	2	3	1	1	1	4	1	1	2	4	4	1	1	4	3	1	2	1	5	1
104	386	1	74	2	1	10	2	1	1	1	3	2	2	1	2	3	3	3	2	3	2	1	2	3	1	3	2	3	3	2	3	2	3	3	3	3	3	3	3	3	2	2	3	3	2	2	2	3	1
105	169	2	75	1	1	10	1	2	2	1	2	1	3	3	2	2	3	2	2	2	2	2	3	2	1	1	3	3	3	1	2	2	3	3	3	4	3	2	1	2	3	3	1	4	2	2	2	3	2
106	178	2	55	1	3	1	3	2	4	3	2	1	3	1	1	1	1	2	1	2	2	2	3	1	1	2	1	3	2	1	3	3	2	1	3	2	1	3	3	3	2	2	2	3	1	1	1	4	1
107	133	2	55	1	1	1	2	2	5	1	2	2	1	1	1	1	1	1	1	1	2	1	1	1	1	1	1	3	1	1	1	1	1	1	4	4	4	4	4	1	4	4	4	1	1	1	1	1	1
108	217	2	63	1	1	1	4	2	5	1	2	1	1	1	1	1	1	1	1	2	2	1	2	2	2	2	2	2	2	2	2	1	2	2	2	2	2	2	2	2	2	2	2	2	1	1	1	3	1
109	205	2	70	1	1	1	1	2	2	1	2	1	1	1	1	1	1	1	1	1	2	1	1	1	4	4	1	3	3	1	1	1	1	1	1	1	1	3	3	3	1	1	1	1	1	4	4	4	1
110	90	2	71	1	1	11	2	2	2	1	3	2	2	2	2	2	2	2	2	2	2	3	3	3	3	3	3	3	3	3	3	2	3	3	3	3	3	3	3	3	3	3	3	3	3	3	3	3	3
111	154	2	58	1	2	1	2	2	5	1	3	1	1	1	1	1	1	1	1	1	2	1	3	2	2	4	2	3	3	2	2	1	1	2	2	3	2	2	2	3	2	2	2	3	1	1	1	4	1
112	74	1	69	1	1	11	2	2	2	1	2	1	2	2	2	2	2	2	2	2	2	3	3	3	3	3	3	3	3	3	3	3	3	3	3	3	3	3	3	3	3	2	2	3	3	3	3	3	3
113	227	2	65	1	2	10	2	2	5	1	2	1	1	1	1	1	1	1	1	1	2	1	3	2	5	3	2	1	2	2	2	2	3	3	3	3	3	3	3	3	2	2	3	2	2	2	2	4	2
114	311	2	68	2	1	1	2	2	5	3	2	1	1	1	1	1	1	1	1	1	2	1	5	1	5	5	1	4	4	4	1	1	4	1	4	4	2	4	4	4	4	1	4	3	1	1	1	5	1
115	81	1	66	2	3	1	3	2	1	1	2	1	1	1	1	1	1	1	1	1	2	1	5	5	2	2	4	1	1	1	1	1	1	1	1	1	1	1	1	1	1	1	1	1	1	1	1	1	1
116	71	2	68	1	1	11	1	2	2	1	3	2	1	2	2	2	2	2	2	2	2	3	3	3	3	2	2	3	1	1	1	1	1	1	1	1	1	1	1	1	1	1	1	1	1	1	1	1	1
117	62	1	55	2	1	1	3	2	1	3	2	2	1	1	1	1	1	1	1	1	2	1	1	1	1	1	1	1	1	1	1	1	1	1	1	1	1	1	1	1	1	1	1	1	1	1	1	1	1
118	164	2	66	1	1	1	4	2	5	1	1	1	1	1	1	1	1	1	1	1	2	1	3	2	1	3	1	3	2	2	3	2	2	2	3	3	3	3	3	3	3	2	3	3	1	1	1	3	1
119	112	1	74	1	1	12	4	2	5	1	2	1	1	1	1	1	1	1	1	1	2	1	4	1	1	3	1	2	2	2	2	1	1	1	1	3	3	3	2	2	2	3	3	3	2	2	2	2	2
120	90	1	78	1	1	12	3	2	5	1	2	1	1	1	1	1	1	1	1	1	2	1	1	1	1	1	1	2	2	2	2	2	2	2	2	2	2	3	3	3	2	2	2	2	1	1	1	3	1
121	783	2	60	1	1	11	2	2	5	1	4	2	2	2	1	2	3	2	3	3	2	3	2	2	1	2	2	3	3	3	3	2	3	3	3	2	3	3	2	3	2	2	2	2	3	3	3	3	3
122	330	2	54	2	2	1	2	2	2	1	3	2	2	2	1	1	1	1	2	2	2	2	2	2	2	2	2	2	2	2	2	1	1	1	1	1	1	1	4	4	2	2	2	3	2	2	2	2	2
123	301	2	66	1	1	1	3	2	5	1	2	2	2	2	1	1	1	1	1	1	2	1	1	1	1	1	1	4	4	3	4	1	1	1	1	3	4	4	4	4	1	4	4	4	1	1	1	1	1
124	233	1	36	1	1	1	2	2	5	1	3	2	1	1	1	1	1	1	1	1	2	1	1	1	1	1	1	4	4	2	4	1	1	1	1	3	3	4	4	4	1	4	4	4	1	1	1	1	1
125	264	2	66	1	1	11	2	2	5	1	2	2	2	1	2	2	2	2	2	2	2	2	2	2	4	4	2	3	2	1	2	2	2	2	3	3	3	3	3	3	2	2	3	3	3	2	2	4	1
126	1213	2	66	1	1	1	1	1	5	1	1	2	2	1	1	1	1	1	1	2	2	2	2	1	2	3	2	2	2	3	3	2	3	2	3	3	3	3	2	3	2	3	2	2	2	2	1	4	1
127	1338	2	67	1	1	11	2	2	2	1	3	1	2	3	3	2	3	3	3	3	2	1	4	2	1	2	2	2	2	2	3	2	3	3	3	3	2	2	3	3	2	3	3	2	2	2	1	4	2
128	394	2	64	2	3	1	3	2	5	1	4	1	1	1	1	1	1	1	1	1	2	1	5	1	3	3	3	3	1	1	4	4	2	2	1	1	1	1	3	2	4	4	1	1	1	1	1	5	1
129	374	1	43	1	3	1	3	1	5	1	1	2	3	2	2	2	2	1	2	2	2	2	1	2	1	1	1	4	2	3	4	4	4	3	3	3	3	3	3	3	3	3	3	3	4	2	2	2	2
130	101	1	71	1	1	1	1	2	5	1	1	1	1	1	1	1	1	1	1	1	2	1	1	1	1	1	1	2	2	2	2	2	2	2	2	2	2	2	2	2	2	2	2	2	2	2	2	2	2
131	185	2	63	2	3	1	2	1	5	1	2	2	3	2	2	2	2	3	3	2	2	2	2	2	2	2	2	2	2	1	2	2	2	2	2	2	2	2	2	2	2	1	2	3	3	3	3	4	2
132	77	1	72	1	1	11	2	2	2	1	3	1	2	2	2	2	2	2	2	2	2	3	3	3	3	3	3	3	3	3	3	2	3	3	3	3	3	3	3	3	3	3	3	3	2	3	2	3	3
133	136	2	50	2	2	1	2	1	5	1	3	1	1	1	1	1	1	1	1	1	2	1	1	1	1	1	1	3	3	1	1	1	1	1	1	1	1	1	1	1	1	1	1	1	1	1	1	1	1
134	71	1	69	1	2	10	2	2	1	1	2	2	2	2	2	2	2	2	2	2	2	3	3	3	3	3	3	3	3	3	3	3	3	3	3	3	3	3	3	3	3	3	3	3	3	3	3	3	3
135	121	2	53	1	1	12	2	2	2	1	3	2	1	1	1	1	1	1	1	1	2	1	1	1	1	1	1	4	4	4	4	4	4	4	4	4	4	4	4	4	4	4	4	4	1	1	1	1	1
136	161	1	70	1	1	1	1	1	5	1	3	2	2	2	2	2	1	1	1	2	2	2	2	2	2	2	2	3	2	2	2	2	2	2	2	2	3	3	2	3	2	2	2	3	1	1	1	3	1
137	215	1	31	1	3	12	3	2	5	3	1	2	3	3	3	3	3	3	3	3	2	3	3	3	3	3	3	3	3	3	3	2	2	2	2	2	2	2	2	2	2	2	2	2	3	3	3	3	3
138	163	2	65	1	1	1	2	2	2	1	2	2	1	1	1	1	1	1	1	1	2	1	4	1	3	4	1	1	1	1	3	1	1	1	1	1	1	1	3	3	1	1	3	3	1	1	1	3	1
139	300	2	59	1	1	1	1	2	2	1	2	1	1	1	1	1	1	1	1	1	2	1	5	1	1	3	1	1	1	1	4	1	4	4	4	4	4	4	4	4	1	1	4	4	1	1	1	5	1
140	230	1	66	1	1	10	4	2	5	1	1	1	1	1	1	1	1	1	1	1	2	2	4	2	2	3	2	3	3	2	2	2	2	2	2	2	2	2	3	3	2	2	2	2	2	2	2	3	2
141	68	1	52	1	1	1	2	2	5	1	3	1	1	1	1	1	1	1	1	1	2	1	1	1	1	1	1	4	4	4	4	1	1	1	1	4	4	4	4	4	4	4	4	4	1	1	1	1	1
142	1223	1	56	1	2	1	3	2	2	1	2	2	1	1	1	1	2	1	1	1	2	1	2	2	2	2	2	3	2	1	2	1	3	3	3	3	2	3	3	3	3	2	3	3	2	2	2	3	2
143	198	2	66	2	1	1	2	1	2	1	2	1	1	1	1	1	1	1	1	1	2	1	3	1	3	1	1	3	1	1	3	2	3	3	3	3	3	3	3	3	3	1	3	3	1	1	1	3	1
144	196	2	53	1	1	11	2	2	4	1	3	2	1	1	1	1	1	1	1	2	2	2	2	2	3	2	2	3	2	2	2	2	3	2	3	3	3	2	3	3	3	3	3	3	2	2	3	2	2
145	63	2	66	2	2	1	4	1	5	1	1	2	1	1	1	1	1	1	1	1	2	1	1	1	1	1	1	1	1	1	1	1	1	1	1	1	1	1	1	1	1	1	1	1	1	1	1	1	1
146	96	1	56	2	3	1	3	2	2	3	1	2	1	1	1	1	1	1	1	1	2	1	1	1	1	1	1	1	1	1	1	1	1	1	1	1	1	1	1	1	1	1	1	1	1	1	1	1	1
147	122	2	60	1	2	1	3	2	5	1	1	1	1	1	1	1	1	1	1	1	2	1	1	1	1	1	1	1	1	1	1	1	1	1	1	1	1	1	1	3	3	3	3	3	1	1	1	1	1
149	206	2	69	1	3	1	2	1	2	1	3	1	1	1	1	1	1	1	1	1	2	1	4	1	3	4	1	1	1	1	3	1	1	1	3	1	1	1	3	3	1	1	3	1	1	3	1	5	1
150	69	2	60	2	2	1	3	2	2	1	2	2	1	1	1	1	1	1	1	1	2	1	1	1	1	1	1	1	1	1	1	1	1	1	1	1	1	1	1	1	1	1	1	1	1	1	1	1	1
151	100	2	57	2	2	10	3	2	2	1	2	1	1	1	1	1	1	1	1	1	2	1	1	1	1	1	1	2	2	2	2	1	2	2	3	3	2	2	2	2	2	2	2	2	2	2	2	2	2
152	118	2	65	1	1	12	2	2	1	1	2	1	1	1	1	1	1	1	1	1	2	1	3	1	1	1	1	2	2	2	3	2	2	3	2	2	3	2	3	3	2	2	3	2	1	1	1	4	1
153	134	2	75	1	1	11	2	2	5	1	2	1	1	1	1	1	1	1	1	1	2	2	2	2	2	2	2	3	3	2	2	2	2	3	2	3	3	3	2	3	3	2	2	3	2	2	2	3	2
154	81	2	66	1	1	12	2	2	5	1	1	1	1	1	1	1	1	1	1	1	2	2	2	2	2	2	2	3	3	3	3	3	3	3	3	3	3	3	3	3	3	3	3	3	3	3	3	3	3
155	67	1	59	1	2	12	3	2	5	1	2	1	1	1	1	1	1	1	1	1	2	2	2	2	2	2	2	3	3	3	3	3	3	3	3	3	3	3	3	3	3	3	3	3	3	2	2	2	2
156	169	2	66	1	1	11	1	2	2	1	4	1	2	2	2	2	2	2	3	3	2	2	2	2	3	2	2	3	3	3	2	1	3	3	3	3	3	3	4	2	2	2	3	3	3	2	2	4	2
157	125	2	49	1	3	1	3	2	2	1	2	2	1	1	1	1	1	1	1	1	2	2	4	2	2	2	2	3	2	2	3	2	2	2	3	3	3	3	2	3	3	3	3	3	3	3	3	3	3
158	74	1	55	1	2	1	3	2	2	1	2	2	2	2	1	1	1	1	1	1	2	3	2	3	2	3	2	3	3	2	3	2	3	3	3	3	3	3	3	3	3	3	3	3	2	2	2	3	2
159	72	2	69	1	1	1	2	2	2	1	2	2	2	1	2	2	1	2	2	2	2	3	3	3	2	2	2	3	3	2	3	3	3	3	2	3	3	3	3	3	3	3	3	3	2	3	2	3	2
160	343	2	59	1	1	1	1	2	5	1	3	1	2	2	2	2	2	2	3	3	1	3	3	3	3	3	3	3	3	2	2	2	2	2	2	3	3	2	3	2	3	3	3	3	3	3	3	3	3
161	118	2	56	1	2	1	1	2	5	1	3	1	2	2	2	2	2	2	2	2	2	2	2	2	2	2	2	3	3	2	2	2	3	3	2	3	3	3	3	3	3	3	2	3	2	3	2	3	2
162	1375	2	55	2	2	1	2	2	1	1	1	2	1	1	1	1	1	1	1	1	2	1	1	1	1	1	1	3	1	1	1	1	1	1	1	1	1	1	1	1	1	1	1	1	1	1	1	1	1
163	154	2	56	1	1	11	2	2	5	1	2	1	1	1	1	1	1	1	1	1	2	1	1	1	1	1	1	2	1	1	1	1	4	4	4	4	4	4	4	4	4	4	4	4	5	5	5	5	1
164	66	2	56	1	2	1	2	2	1	1	1	1	1	1	1	1	1	1	1	1	2	1	1	1	1	1	1	1	1	1	1	1	1	1	1	1	1	1	1	1	1	1	1	1	1	1	1	1	1
165	60	2	70	1	1	1	3	2	2	3	2	1	1	1	1	1	1	1	1	1	2	1	1	1	1	1	1	1	1	1	1	1	1	1	1	1	1	1	1	1	1	1	1	1	1	1	1	1	1
166	121	2	60	1	1	11	2	2	2	1	3	2	1	1	1	1	1	1	1	1	2	1	1	1	1	1	1	4	4	4	4	4	4	4	4	4	4	4	4	2	4	4	2	2	1	1	1	1	1
167	1404	1	46	2	2	1	3	2	4	1	2	2	2	2	1	1	1	1	1	1	2	2	2	2	2	2	2	3	3	2	3	2	3	2	3	3	3	2	3	3	3	2	3	3	4	3	4	3	4
168	88	1	56	1	1	11	1	1	4	1	3	2	2	2	2	2	2	2	2	2	2	3	3	2	3	2	3	3	3	3	3	3	2	3	3	3	3	3	3	3	3	2	3	3	3	3	2	3	3
169	93	1	69	1	1	11	2	2	5	1	3	2	2	2	2	2	2	2	2	2	2	2	3	3	3	2	2	3	3	3	3	2	3	3	3	3	3	3	3	2	3	3	3	3	3	3	3	3	3
170	558	2	68	2	2	10	2	1	2	1	4	2	2	2	2	2	3	3	3	3	2	2	2	2	1	3	2	2	2	3	3	2	3	3	3	3	3	3	3	3	2	2	3	2	1	2	2	4	2
171	124	2	63	1	2	1	3	2	2	1	3	1	1	1	1	1	1	1	1	1	2	1	4	1	3	4	1	1	1	1	3	1	1	1	3	1	1	1	3	1	1	1	1	1	1	1	1	4	1
172	118	2	66	1	1	12	2	2	4	1	4	1	2	2	2	2	2	2	2	2	2	2	3	2	1	2	2	3	3	1	3	2	3	2	3	3	3	3	3	3	3	3	3	3	2	2	2	4	2
173	74	2	56	1	3	1	3	2	5	1	1	2	1	1	1	1	2	1	1	2	2	2	2	2	2	2	2	3	2	2	3	2	3	3	3	3	3	3	3	3	3	3	3	3	4	3	3	3	3
174	85	1	63	1	1	1	2	2	2	1	2	1	1	1	1	1	1	1	1	1	2	1	1	1	1	1	1	2	3	2	3	2	3	3	2	3	3	3	3	3	3	2	3	2	1	1	1	4	1
175	84	1	69	1	1	1	1	2	4	1	2	2	2	2	2	2	2	2	2	3	2	2	2	3	2	2	2	3	2	2	3	3	3	3	3	3	2	3	3	3	3	3	3	3	3	3	3	3	3
176	69	2	70	1	1	11	1	2	5	1	3	1	1	1	1	1	1	1	1	1	2	1	3	1	3	1	1	2	3	2	3	3	2	3	3	3	3	3	3	3	3	3	3	3	1	1	1	3	1
177	103	2	70	1	2	1	3	2	5	1	1	2	1	1	1	1	1	1	1	1	2	1	1	1	1	1	1	1	1	1	1	1	1	1	1	1	1	1	1	1	1	1	1	1	1	1	1	1	1
178	94	1	55	2	1	1	2	1	2	1	2	2	2	2	2	2	2	2	2	2	2	1	2	1	1	1	1	2	3	2	3	2	3	3	3	3	3	3	3	3	3	3	3	3	3	3	3	3	3
179	65	2	69	1	2	10	2	2	4	1	3	1	1	1	1	1	1	1	1	1	2	1	1	1	1	1	1	3	3	3	3	3	3	3	3	3	3	3	3	3	3	3	3	3	1	1	1	1	1
180	101	2	69	2	2	10	2	2	4	1	2	2	1	1	1	1	1	1	1	1	2	1	1	1	1	1	1	2	1	1	1	4	4	4	4	4	4	4	4	4	4	4	4	4	1	1	1	1	1
181	74	2	53	1	1	1	2	2	5	1	4	2	1	1	1	1	1	1	1	1	2	1	1	1	1	1	1	4	4	4	2	1	1	1	1	4	3	3	3	3	3	3	3	3	1	1	1	1	1
182	74	2	58	1	1	1	2	2	5	1	2	2	1	1	1	1	1	1	1	1	2	1	1	1	1	1	1	3	3	3	3	1	1	1	1	1	2	1	1	4	4	4	4	4	1	1	1	1	1
183	65	2	66	2	2	1	3	2	2	1	4	1	2	2	2	2	2	2	1	2	2	1	1	1	1	1	1	2	2	2	2	2	2	2	2	2	2	2	2	2	2	2	2	2	1	1	1	1	1
184	145	1	66	1	1	1	1	1	2	1	4	1	1	1	2	2	2	2	2	2	2	1	1	1	1	1	1	1	1	1	1	1	1	3	3	1	1	1	1	1	1	1	1	1	1	1	1	1	1
185	62	2	73	1	1	1	1	2	1	1	5	1	1	1	1	1	1	1	1	1	2	1	1	1	1	1	1	1	1	1	1	1	1	1	1	1	1	1	1	1	1	1	1	1	1	1	1	1	1
186	60	1	36	2	3	1	2	2	5	3	1	2	1	1	1	1	1	1	1	1	2	1	1	2	2	2	2	2	2	2	2	2	2	2	2	2	2	2	2	2	2	2	2	2	2	2	2	2	2
187	670	2	78	1	1	11	2	1	4	1	5	2	3	3	3	3	3	3	3	3	2	2	2	2	2	2	1	3	2	2	3	2	3	3	3	3	3	3	3	3	3	3	2	3	4	2	3	3	2
188	636	2	75	1	1	11	2	1	1	1	5	2	3	3	3	3	3	3	3	3	2	2	3	3	2	3	2	3	2	2	3	2	2	2	3	3	2	3	3	3	2	2	3	3	2	2	2	3	2
189	640	2	78	2	3	10	4	2	4	3	4	1	1	1	1	1	1	1	1	1	2	1	5	1	4	5	1	1	1	1	2	1	3	4	2	3	2	2	2	4	1	2	3	3	2	1	1	4	1
190	344	2	64	1	1	10	2	2	5	1	4	1	1	1	1	1	1	1	1	1	2	1	5	1	3	4	1	1	1	1	1	1	1	1	1	1	1	1	1	4	4	1	4	1	1	1	1	5	1
191	221	2	59	2	2	1	2	2	2	1	3	1	3	2	2	2	2	2	2	2	2	1	2	2	1	2	2	3	2	2	3	2	2	3	3	3	3	3	3	3	2	2	3	3	2	2	2	3	2
192	235	1	62	1	1	11	2	2	5	1	4	1	2	2	2	2	2	3	3	3	2	2	2	1	1	2	2	3	3	2	2	3	3	2	3	3	3	3	3	3	2	1	3	3	2	2	1	2	2
193	155	2	65	1	1	11	2	2	1	1	4	1	2	2	2	2	2	2	2	2	2	1	4	2	1	2	2	2	3	2	3	2	3	3	3	3	2	3	3	3	2	2	3	3	2	2	2	4	2
194	239	2	60	1	3	1	2	2	2	1	4	1	2	2	2	1	2	2	2	1	2	2	2	3	1	2	2	3	3	3	3	2	3	1	3	3	2	3	3	3	2	2	3	2	1	2	1	3	2
195	316	2	61	1	1	1	1	2	4	1	3	1	2	2	2	3	3	2	3	2	2	1	3	2	2	2	2	3	3	2	3	2	3	3	3	3	3	3	3	3	2	2	3	3	2	3	2	4	2
196	359	2	66	1	2	10	2	2	5	1	5	1	2	2	2	2	2	2	3	3	2	2	3	1	1	2	2	3	3	2	2	2	3	3	3	3	3	3	3	3	2	3	3	3	2	2	1	4	2
197	300	2	70	1	1	11	2	1	2	1	5	1	2	2	2	2	2	2	2	3	2	2	2	2	2	2	2	3	2	2	2	2	3	3	3	3	3	3	3	3	3	3	3	3	2	2	2	3	2
198	193	2	63	1	1	1	1	2	1	1	4	1	2	2	2	2	2	2	3	2	2	2	2	2	2	2	2	3	3	2	2	2	3	3	3	3	3	3	3	3	2	2	3	3	3	2	2	3	2
199	444	2	69	2	2	10	2	1	2	1	5	1	2	1	2	2	2	1	2	2	2	1	2	2	2	2	2	3	3	1	2	2	3	2	3	3	3	3	3	3	2	2	3	3	1	2	2	4	2
200	95	1	61	2	1	10	2	2	2	1	3	1	2	2	2	2	2	2	2	3	2	2	2	3	2	2	3	3	3	3	3	2	3	3	3	2	3	3	3	3	3	3	3	3	2	2	2	2	2
201	990	2	68	1	1	11	1	2	5	1	4	1	2	2	2	2	2	2	3	3	2	3	2	2	3	2	2	3	3	2	3	3	3	3	2	3	3	3	3	3	3	3	3	3	3	2	2	3	2
202	1826	1	57	1	2	12	2	2	5	1	3	1	2	2	1	1	2	2	2	2	2	2	2	1	2	2	2	3	3	2	3	1	3	2	3	3	3	3	3	3	2	3	3	3	2	2	2	3	2
203	294	2	62	1	1	11	1	2	1	1	3	1	2	2	2	2	2	2	2	2	2	2	2	3	1	2	2	3	3	3	3	2	3	3	3	3	3	3	3	3	3	3	3	3	2	2	3	2	3
204	443	2	68	2	3	10	3	2	4	1	3	2	2	2	1	1	1	1	1	1	2	2	4	2	2	2	2	2	2	2	3	2	3	2	3	3	2	3	3	3	2	2	3	3	2	2	1	2	2
205	784	2	72	1	1	11	1	1	2	1	5	2	3	3	3	3	3	3	3	3	2	2	3	2	1	2	1	3	3	2	3	2	3	3	2	3	3	3	3	3	2	2	3	3	3	2	2	2	2
206	553	1	76	1	1	1	2	1	2	1	5	2	3	3	3	3	3	3	3	3	1	2	2	3	1	2	2	3	3	2	3	2	3	3	2	3	3	3	2	3	3	2	3	3	2	3	2	3	2
207	193	2	70	1	1	11	2	2	1	1	3	1	2	2	2	2	2	2	2	3	2	2	3	2	2	3	2	3	3	3	3	2	3	3	3	3	3	3	3	3	2	3	3	3	2	3	2	2	2
208	278	2	69	1	1	11	2	2	5	1	3	1	2	2	3	2	2	2	2	2	2	2	3	2	1	2	2	3	3	2	3	2	2	3	3	3	3	3	3	3	3	3	3	3	2	2	2	2	2
209	173	1	63	2	1	10	2	2	2	3	3	1	1	2	1	2	2	2	2	2	2	2	2	2	1	1	2	3	3	2	2	2	3	3	3	3	3	3	3	3	3	3	3	3	2	1	2	3	2
210	408	2	68	1	3	10	2	2	1	1	2	1	2	2	2	2	2	3	2	3	2	2	2	2	3	3	2	3	3	2	3	3	3	3	2	3	3	3	3	3	2	2	2	4	2	3	2	3	2
211	318	2	66	2	2	10	2	2	5	1	2	1	2	2	2	2	2	2	2	2	2	2	2	2	2	3	2	3	3	2	2	2	3	3	3	3	3	3	3	3	3	3	3	3	2	3	2	2	2
213	65	1	70	1	1	10	2	2	2	1	2	2	2	2	1	2	2	2	2	2	2	3	3	2	3	3	3	3	3	3	3	2	2	3	3	3	3	3	3	3	3	3	3	3	3	3	3	3	3
214	61	2	59	1	1	1	2	2	1	1	2	1	1	2	1	1	2	2	2	1	2	3	3	3	3	3	3	3	3	3	3	2	3	3	3	3	3	3	3	3	3	3	3	3	4	3	4	4	3
215	65	1	56	1	2	11	3	2	5	1	2	2	2	2	2	2	2	2	2	2	2	3	3	3	3	3	3	3	3	3	3	3	3	3	3	3	3	3	3	3	3	3	3	3	4	4	4	4	4
216	79	2	66	1	1	1	3	2	5	1	3	2	2	2	2	2	1	1	1	1	2	1	2	3	1	1	1	2	2	2	4	2	2	2	2	2	2	2	2	2	2	2	2	2	2	2	2	2	2
217	1014	2	74	1	1	10	1	2	2	1	5	1	1	2	1	1	1	1	1	2	2	1	5	1	2	4	1	1	1	2	3	2	3	2	2	2	2	2	2	4	2	2	2	2	2	2	2	5	2
218	1189	1	67	1	1	1	3	2	2	1	2	1	2	3	1	2	1	1	1	1	2	2	3	2	2	2	1	2	2	2	3	2	3	3	2	3	3	3	2	3	3	3	2	2	2	2	2	2	2
219	101	2	66	1	2	10	2	2	2	1	3	1	2	2	2	2	1	2	2	2	2	2	3	2	2	1	1	3	3	3	2	2	3	3	3	3	3	3	3	3	3	3	3	3	2	2	2	3	2
220	273	1	73	2	2	1	3	2	2	3	4	2	2	2	2	2	3	3	3	3	2	2	3	3	2	3	2	3	3	2	3	2	3	3	2	3	3	3	2	3	2	3	3	2	2	2	2	2	2
221	414	2	63	1	1	10	2	2	5	1	3	1	1	2	2	1	2	1	2	2	2	1	3	2	2	2	2	3	2	2	3	2	3	3	3	2	3	3	3	3	3	2	3	3	2	3	2	2	2
222	400	1	63	2	1	10	2	2	2	1	3	1	1	1	1	1	2	1	1	3	2	1	2	1	3	2	1	3	2	3	3	2	2	3	2	3	3	3	3	3	3	2	3	3	1	2	1	3	1
223	112	1	75	2	3	1	3	1	2	3	1	2	1	1	1	1	1	1	1	1	2	1	1	1	1	1	1	2	3	2	3	2	3	2	3	2	3	2	3	1	3	2	3	2	3	3	3	3	3
224	255	2	61	2	2	1	4	2	2	1	2	2	2	1	1	1	2	1	1	2	2	2	3	2	3	3	1	2	2	1	3	1	1	2	3	2	2	2	3	3	2	2	3	2	2	2	1	4	1
225	464	2	62	1	1	11	2	2	2	1	2	2	3	3	3	3	3	2	3	3	2	5	5	5	5	5	5	4	4	4	4	4	4	4	4	4	4	4	4	4	4	4	4	4	3	4	4	1	4
226	316	2	26	1	3	1	1	1	5	1	2	2	2	3	3	1	2	3	2	3	2	2	1	2	1	3	1	3	3	3	2	2	3	4	2	4	4	3	3	3	2	2	2	4	2	2	2	3	2
227	126	2	68	1	1	11	1	2	5	1	3	1	2	2	1	2	2	2	2	2	2	2	2	2	2	2	2	3	3	3	3	3	3	3	3	3	2	3	3	3	3	3	3	3	2	2	2	2	2
228	104	2	69	1	2	10	2	2	1	3	4	1	2	2	1	2	2	1	2	2	2	2	3	2	2	2	2	3	3	3	3	2	3	3	3	3	3	3	3	3	3	2	3	3	2	2	1	2	2
229	89	2	58	1	1	1	2	2	5	1	3	1	3	3	2	2	2	2	3	3	2	2	2	2	2	2	2	3	3	2	3	3	3	3	3	3	3	3	3	3	3	3	3	3	2	2	2	2	2
230	87	1	62	1	1	1	2	2	5	1	3	1	2	2	2	2	2	2	2	3	2	2	3	2	2	2	2	2	3	3	3	2	3	3	3	3	2	3	3	3	2	3	3	3	2	2	2	3	2
231	218	2	65	2	1	11	1	2	5	4	1	2	3	3	3	3	3	3	3	3	1	2	2	2	2	2	2	2	2	2	3	2	2	2	3	2	2	3	3	3	2	2	3	3	4	4	4	4	4
232	84	2	25	1	3	11	2	1	5	1	1	2	3	3	2	3	2	3	2	2	2	3	3	3	3	3	3	3	3	3	3	3	3	3	3	2	2	3	3	3	3	3	2	2	3	3	3	3	3
233	76	1	63	1	1	1	2	2	1	1	2	1	1	1	1	1	1	1	1	1	2	1	3	1	2	4	2	2	3	2	3	2	3	2	3	2	2	2	3	2	3	2	3	2	2	2	2	3	2
237	284	2	61	1	1	1	2	2	5	1	2	1	1	1	1	1	1	1	1	1	2	1	1	1	1	1	1	4	4	4	4	1	1	1	1	1	1	1	1	1	1	1	1	1	1	1	1	1	1
238	147	1	66	1	1	1	3	2	2	1	1	1	1	1	1	1	1	1	1	1	2	1	1	1	1	1	1	1	1	1	1	1	1	1	1	1	1	1	1	1	1	1	1	1	1	1	1	5	1
239	67	2	58	1	1	11	1	2	2	1	3	1	2	2	2	2	2	2	2	3	2	2	2	1	2	2	2	3	3	2	2	3	3	3	3	3	3	3	3	3	3	3	3	3	2	2	2	2	2
240	307	2	65	1	1	10	2	2	5	1	3	1	1	2	2	2	2	2	3	3	2	2	2	2	1	2	2	3	2	2	3	3	3	3	2	3	3	3	4	3	3	3	3	3	2	2	2	2	2
241	332	2	66	2	1	10	2	2	2	1	3	1	1	2	2	2	1	1	2	2	2	2	2	2	2	2	2	3	3	2	2	3	3	3	3	3	3	3	3	3	3	3	3	3	2	2	2	2	2
242	368	1	59	2	2	1	2	2	5	1	3	1	1	2	2	2	2	2	2	3	2	2	3	3	3	3	3	3	3	3	3	2	2	2	3	3	3	3	3	3	3	3	3	3	2	2	2	2	2
243	198	2	63	1	1	1	2	2	2	1	1	2	2	2	3	2	2	3	2	3	2	4	3	4	3	4	4	3	2	3	2	3	3	2	3	3	3	3	3	2	3	3	2	3	4	3	4	3	3
244	270	1	67	1	1	10	2	1	5	1	3	1	1	2	2	2	2	2	1	2	2	2	2	1	2	2	2	3	3	2	2	3	3	3	3	3	3	3	3	3	3	3	3	3	2	2	2	2	2
245	338	1	70	1	2	1	3	1	5	1	2	2	1	1	2	1	2	1	1	1	2	4	3	3	3	2	3	3	3	2	3	3	2	3	3	3	2	3	2	3	3	2	2	3	3	3	3	3	3
246	99	2	66	2	2	1	3	2	5	1	1	2	2	2	2	2	2	2	2	2	2	3	3	3	3	3	3	3	2	3	3	3	3	2	3	2	3	2	2	3	2	3	2	3	3	3	3	3	3
248	68	2	66	2	2	1	3	2	5	3	2	2	2	2	2	2	2	2	2	2	2	3	3	3	3	3	3	2	2	3	3	2	3	2	3	2	3	2	2	3	2	2	3	2	3	3	3	3	3
249	669	2	66	1	1	11	2	2	2	1	3	1	1	1	2	2	2	1	2	2	2	2	2	1	2	2	2	3	3	2	3	3	2	3	3	3	3	3	3	3	3	3	3	3	2	2	2	2	2
250	215	2	68	1	1	1	1	2	2	1	3	1	2	2	1	2	2	1	2	2	2	2	2	2	2	2	2	3	2	3	3	3	3	3	2	2	3	3	3	3	3	3	3	3	2	2	2	2	2
251	172	1	61	1	1	11	2	2	5	1	3	1	2	2	1	1	2	1	1	2	2	2	2	2	2	1	2	3	3	2	2	3	3	3	3	3	3	3	3	3	3	3	3	2	2	2	2	2	2
252	264	2	64	2	3	1	2	2	5	3	4	1	1	2	2	2	2	2	3	2	2	2	2	2	2	2	2	3	3	3	3	3	3	2	3	3	3	3	3	3	3	3	3	3	2	2	2	2	2
253	312	2	62	1	1	11	2	2	5	1	3	1	1	2	2	2	2	2	3	3	2	2	2	2	1	2	2	3	3	2	3	3	3	2	3	3	3	3	3	3	3	3	3	3	2	2	2	2	2
254	326	2	63	1	1	1	2	2	5	1	2	1	1	1	2	2	1	1	1	2	2	2	2	2	2	2	1	2	2	2	3	3	3	3	3	2	3	3	3	3	3	3	3	3	2	2	2	2	2
255	208	1	67	1	2	10	2	2	5	3	2	1	2	2	1	2	2	2	1	2	2	2	3	2	1	1	1	3	3	2	3	3	3	3	3	3	3	3	3	3	3	3	3	3	2	2	2	2	2
256	216	2	60	1	1	1	1	2	4	1	3	1	2	3	3	3	2	2	3	3	2	3	3	3	3	2	2	3	3	3	2	3	3	3	2	3	3	3	3	3	3	3	2	2	3	2	3	3	3
257	403	1	67	2	2	10	2	2	5	1	2	1	1	1	2	2	1	1	2	1	2	2	1	1	2	2	1	3	3	2	3	1	3	3	3	3	2	3	3	3	3	1	3	3	2	2	2	2	2
258	359	2	73	1	1	11	2	1	4	1	5	1	1	2	2	2	1	2	3	3	2	2	2	2	2	2	3	3	3	2	2	3	3	3	2	3	3	2	2	3	3	2	2	3	3	3	2	2	2
259	246	2	70	1	2	11	2	2	5	1	4	1	2	1	1	1	2	1	1	1	2	1	1	1	1	1	1	3	3	2	2	3	3	3	3	3	3	3	3	3	3	3	3	3	2	2	2	3	2
260	310	2	56	1	2	1	3	2	5	1	5	1	1	1	1	1	1	1	1	1	2	1	3	1	1	1	1	2	2	2	3	2	4	4	4	4	2	4	4	3	3	2	4	4	1	1	1	1	1
261	719	1	73	1	1	1	1	2	5	1	1	1	2	3	2	1	3	1	1	2	2	2	3	2	1	1	1	3	3	1	3	1	4	4	1	3	1	2	1	2	1	1	3	3	3	1	1	4	1
262	702	1	71	2	1	1	2	2	2	1	1	1	1	1	1	1	1	1	3	1	2	1	5	1	4	4	1	1	2	2	3	1	3	3	1	1	3	3	3	3	1	1	3	2	1	1	1	4	1
263	611	1	79	2	3	10	3	2	5	3	5	1	2	2	1	1	1	1	1	2	2	2	4	1	4	4	2	2	2	2	2	2	3	2	3	2	2	2	2	2	3	3	2	2	2	1	1	4	1
264	209	2	65	1	1	11	3	2	5	1	4	1	1	2	1	1	1	1	1	1	2	1	1	1	1	1	1	1	1	1	1	1	1	1	1	1	1	1	1	3	1	1	1	1	2	2	2	2	2
265	410	2	65	1	1	11	2	2	5	1	3	1	1	3	1	1	2	2	2	1	2	1	3	2	1	4	1	2	3	2	3	1	3	3	3	3	3	3	3	3	2	3	3	2	4	1	1	4	1
266	690	2	67	2	2	10	3	2	5	1	4	1	1	3	1	1	3	1	1	1	2	1	2	1	1	2	2	3	2	1	3	2	3	3	2	3	3	4	3	4	4	1	3	3	2	2	2	5	1
267	295	2	64	1	1	12	1	1	2	1	5	1	3	3	1	1	3	1	2	2	2	1	1	1	1	1	1	4	3	3	3	2	4	2	2	3	3	3	3	3	4	3	3	4	3	2	2	3	2
268	405	2	62	1	2	1	2	2	5	1	3	1	3	1	1	1	1	1	1	2	2	1	1	1	1	1	1	2	2	2	2	1	1	3	1	3	3	3	3	3	2	2	2	3	2	2	2	4	2
269	329	2	70	1	1	11	1	2	5	1	5	1	3	2	3	3	2	2	3	1	2	1	2	1	2	2	1	3	3	2	3	1	3	3	2	3	2	3	3	3	2	1	3	3	5	2	1	5	1
270	420	2	67	2	1	10	2	2	2	1	5	1	3	3	1	1	1	1	1	1	2	1	5	1	1	1	1	3	3	3	1	2	3	3	4	4	4	4	4	4	4	4	4	4	1	1	1	5	1
271	393	2	63	2	1	10	4	2	5	3	2	2	2	2	2	2	1	1	1	2	2	1	3	1	3	4	1	2	2	2	3	1	2	2	3	2	2	3	3	3	2	2	3	3	1	1	1	5	1
272	345	2	68	1	1	11	1	2	5	1	1	1	3	2	2	2	3	3	2	2	2	1	4	1	1	2	1	2	3	3	2	1	3	3	3	4	3	3	3	3	3	3	3	2	5	2	1	5	1
273	610	1	64	1	1	12	1	2	2	3	2	1	3	2	2	2	3	2	2	2	2	1	4	2	2	4	2	2	2	2	3	2	3	2	2	2	2	3	2	2	2	2	3	2	3	1	1	5	1
274	323	2	74	1	1	1	2	2	5	1	3	1	2	2	2	2	2	2	2	2	2	2	2	2	2	2	2	3	3	3	3	3	3	3	3	3	3	3	3	3	3	3	3	2	2	2	2	2	3
275	111	1	69	2	3	10	2	2	5	3	3	1	1	1	1	1	2	2	1	2	2	2	2	2	2	2	2	3	3	2	3	3	3	3	3	2	2	2	2	2	2	2	3	3	2	1	1	4	2
276	313	2	64	1	1	12	1	1	2	1	2	2	1	1	1	1	1	1	1	1	2	1	5	1	4	4	1	1	1	1	3	1	1	1	3	1	1	1	3	3	1	1	3	3	1	1	1	5	1
277	435	2	79	2	1	1	2	2	2	1	3	1	1	1	1	1	1	1	1	1	2	1	2	1	4	4	1	3	3	2	2	1	3	3	3	3	3	2	2	3	2	3	2	3	1	1	1	4	1
278	74	2	65	1	1	11	1	2	4	1	4	1	2	2	2	3	2	3	3	3	2	2	3	3	3	3	3	3	3	3	3	3	3	3	3	3	3	3	3	3	3	3	3	3	2	2	2	2	3
279	81	2	59	2	1	10	2	2	4	1	5	2	3	2	1	2	2	3	2	2	2	3	4	4	4	3	4	3	2	3	3	2	3	3	3	2	3	2	3	3	3	3	2	3	4	4	5	4	4
280	112	2	73	1	2	1	3	2	2	1	1	2	2	2	2	2	2	2	2	3	2	2	2	2	2	2	2	2	2	2	2	2	3	3	3	3	3	3	3	3	3	3	3	3	3	3	3	3	3
281	76	1	56	1	1	1	2	2	2	1	2	2	2	2	2	2	2	2	2	2	2	2	2	3	3	3	3	3	3	3	3	2	2	2	2	3	3	3	3	2	2	3	3	3	3	3	3	3	3
282	62	2	55	1	2	1	2	1	2	1	2	2	2	2	2	2	2	2	2	2	2	3	3	3	3	3	3	3	3	2	3	3	3	3	2	3	3	3	3	3	3	3	3	3	3	3	3	3	3
283	367	1	67	1	1	10	1	2	2	1	4	1	3	1	2	3	1	1	2	1	2	1	1	1	2	1	2	1	2	1	3	1	3	1	3	2	3	3	1	4	3	4	4	1	2	1	4	2	1
284	373	2	57	1	1	1	2	2	5	1	2	1	1	1	1	2	1	1	2	1	2	2	4	1	2	4	2	1	3	1	3	1	3	1	2	1	1	3	1	4	2	1	2	4	2	1	2	5	1
285	448	2	63	1	1	10	1	2	5	1	5	1	1	1	1	2	2	1	3	2	2	1	3	1	2	1	3	4	3	2	4	1	3	3	2	3	4	2	2	3	3	2	3	4	3	2	2	3	1
286	409	2	57	2	1	10	1	2	2	1	5	1	1	3	3	1	2	3	2	1	2	1	3	2	1	3	1	3	2	1	3	1	2	1	1	1	4	2	1	3	1	1	1	3	1	2	2	5	2
287	627	2	73	2	1	10	2	1	2	1	4	1	2	2	2	1	2	2	3	1	2	3	4	1	1	2	1	3	3	1	2	1	2	1	2	1	4	3	2	2	3	1	4	3	1	2	1	5	2
288	440	2	66	2	2	10	1	2	5	1	5	1	1	1	2	1	1	1	1	3	2	1	4	2	1	2	2	1	2	2	1	1	3	2	2	3	3	1	2	2	1	2	2	2	5	4	1	4	2
289	335	2	61	1	1	10	1	2	5	1	5	1	1	3	3	3	2	1	1	2	2	1	4	2	1	1	2	1	2	2	1	1	2	1	2	1	1	2	2	4	3	3	2	3	3	1	3	4	2
290	276	1	60	1	1	10	1	2	5	1	2	1	1	1	1	1	2	2	1	3	2	2	4	2	1	2	2	1	1	1	3	1	1	1	2	2	2	2	2	2	2	2	1	2	2	2	2	5	2
291	283	1	64	2	1	10	1	2	2	1	4	1	1	1	2	2	1	1	1	1	2	1	5	5	2	3	2	3	2	1	3	1	3	2	2	2	1	2	1	3	1	1	2	1	2	4	1	2	1
292	305	2	54	1	1	10	1	2	5	1	3	1	1	1	1	2	1	1	3	1	2	1	2	1	1	1	4	2	1	1	2	1	2	2	1	1	1	2	2	2	1	1	4	2	4	2	2	4	2
293	498	2	66	2	3	10	2	2	1	1	3	1	1	1	1	1	1	1	1	1	2	1	5	1	1	2	2	2	1	1	2	1	2	2	1	2	1	2	2	4	1	2	2	4	1	1	1	5	2
294	797	2	55	1	1	1	1	2	5	1	3	1	3	2	1	1	3	3	3	3	2	2	2	1	1	2	4	1	4	3	1	1	3	3	4	4	4	3	4	3	3	3	3	3	1	1	1	4	1
295	493	2	67	2	1	1	3	1	2	1	5	1	1	1	1	1	1	1	1	1	2	1	4	1	4	4	1	1	3	2	3	1	3	3	3	3	2	3	3	3	2	2	3	3	1	1	1	5	1
296	86	2	65	1	1	1	2	2	2	1	3	1	2	2	3	2	2	3	3	3	2	2	2	2	3	3	3	3	3	3	3	3	3	3	3	3	3	4	3	3	3	3	3	4	3	3	3	3	2
297	91	2	69	2	2	10	2	2	5	1	2	1	2	2	1	1	2	2	2	2	2	2	3	3	2	1	1	3	3	2	2	2	3	3	2	2	2	3	3	3	2	3	3	3	2	2	2	3	2
298	113	2	57	1	1	12	2	2	5	1	5	2	2	2	2	2	1	1	1	1	1	2	2	2	2	2	2	3	3	3	3	3	3	3	3	3	3	3	3	3	3	3	3	3	2	2	2	2	4
299	61	2	66	2	1	1	2	2	5	4	2	2	2	2	3	3	2	2	2	2	2	1	1	1	1	1	1	3	3	3	3	2	2	2	2	3	3	3	3	3	3	3	2	2	4	4	4	4	4
300	71	2	63	1	2	1	2	2	5	4	4	1	2	2	2	2	1	1	1	1	2	2	2	2	2	2	2	3	3	3	3	2	2	2	2	3	3	3	3	2	2	2	2	3	2	2	2	2	2
301	410	1	71	1	1	1	1	2	5	1	3	1	3	2	2	3	2	1	1	3	2	1	5	2	1	4	2	2	3	2	3	1	2	2	2	3	3	2	1	3	2	3	3	2	1	3	2	3	2
302	343	2	71	2	1	10	2	2	2	1	3	1	3	2	2	2	3	3	3	3	2	1	2	3	2	2	2	3	2	2	3	1	2	2	1	2	2	2	3	2	2	2	2	2	1	1	1	5	2
303	449	2	80	1	1	10	2	1	1	1	5	1	3	2	2	2	1	1	3	1	2	1	4	2	1	2	1	2	2	3	2	1	2	2	1	3	2	2	2	3	2	3	2	4	2	2	1	2	2
304	323	2	62	1	1	1	1	2	2	1	4	1	1	1	1	1	1	1	1	1	2	1	1	1	1	1	1	1	1	2	2	1	2	2	2	1	2	2	1	2	1	2	1	2	1	1	1	5	2
305	327	1	63	1	1	10	1	2	5	1	2	1	1	1	1	1	2	2	2	1	2	1	1	2	1	4	1	1	1	1	1	1	1	1	1	1	1	1	1	1	1	1	1	1	1	1	1	5	1
306	421	1	68	1	1	1	1	2	5	1	5	1	2	2	2	2	1	1	1	3	2	1	4	2	1	2	2	1	2	2	3	1	2	2	1	2	1	3	1	3	2	1	2	3	1	4	1	5	1
307	95	2	72	1	1	11	1	2	5	1	3	1	1	1	1	1	1	1	1	1	2	1	1	1	1	1	1	2	2	2	2	2	2	2	2	3	3	3	3	3	2	3	3	3	4	4	4	4	2
308	151	2	61	2	2	10	2	2	5	1	3	2	2	2	2	2	2	2	2	2	2	2	3	3	3	3	3	2	3	2	3	2	2	3	2	2	2	2	3	2	2	3	2	2	2	3	2	2	2
309	791	2	62	1	2	10	2	1	5	1	3	1	2	1	1	1	1	1	1	3	2	2	4	2	1	3	2	2	1	3	2	1	2	2	2	1	1	3	3	3	2	2	3	3	1	2	1	1	1
310	435	2	72	2	3	10	2	2	5	1	3	1	1	1	1	1	1	1	1	3	2	2	5	1	4	4	1	3	3	3	2	1	3	3	2	3	3	3	3	3	3	2	2	3	1	1	2	3	2
311	265	1	65	2	1	1	1	2	4	1	4	1	1	2	1	1	3	3	2	3	2	3	1	1	1	5	1	1	1	1	3	1	2	2	1	2	1	1	2	4	1	1	2	4	2	1	2	5	1
312	243	1	67	2	1	1	2	2	2	1	2	1	2	2	3	2	2	3	3	3	2	2	2	3	2	2	2	3	3	2	3	2	3	2	3	3	3	3	3	3	3	2	3	3	2	2	2	3	2
313	288	2	78	1	1	10	2	2	1	1	3	1	3	2	1	2	2	2	1	3	2	1	5	1	1	3	2	2	2	2	2	1	2	3	3	2	2	2	3	3	1	1	3	4	1	3	1	4	2
314	606	2	69	1	1	10	2	2	2	1	2	2	3	1	2	2	1	1	2	3	2	1	4	1	1	4	1	1	2	2	3	1	2	1	3	1	2	2	3	2	1	1	1	4	1	1	1	5	1
315	536	2	70	1	1	1	1	1	2	1	4	1	2	1	1	1	2	1	3	1	2	2	3	2	1	3	1	3	2	2	2	1	3	4	2	2	3	3	2	3	2	3	2	4	1	1	1	4	1
316	531	2	76	2	1	1	1	2	5	1	4	1	1	1	1	1	2	1	1	3	2	2	4	1	1	4	1	1	2	1	3	1	1	2	1	2	2	3	1	3	1	1	2	4	1	1	1	5	1
317	565	1	74	1	2	10	2	1	2	1	4	1	2	1	1	1	2	1	1	1	2	1	4	1	1	4	1	3	2	2	3	1	2	2	2	3	1	2	3	3	1	1	2	4	1	2	1	5	1
318	674	2	72	2	1	10	3	2	1	1	3	1	2	1	1	1	1	1	3	3	2	1	3	1	1	3	1	2	2	2	2	1	3	2	1	2	3	3	2	3	2	2	2	4	1	1	1	5	2
319	750	1	69	1	1	10	1	2	2	1	3	1	2	1	1	2	1	1	2	3	2	2	5	1	1	4	1	1	2	2	3	1	2	2	3	1	2	2	2	3	1	1	2	3	1	1	1	5	1
320	664	2	75	1	1	10	2	1	5	1	4	1	2	2	2	3	1	1	3	3	2	2	4	1	4	4	1	2	2	1	2	1	2	2	1	2	2	3	2	3	2	2	3	3	2	2	1	4	2
321	287	1	70	2	1	1	4	2	5	1	1	2	1	1	1	1	1	1	1	1	2	1	3	1	4	3	1	3	2	2	2	2	3	3	3	3	2	3	3	3	2	2	3	2	2	2	2	2	2
322	280	1	68	1	1	1	1	2	5	1	4	1	1	2	2	3	1	1	3	3	2	1	4	1	1	3	1	2	2	2	1	1	2	2	2	2	2	1	2	2	2	2	2	3	1	1	1	5	1
323	336	2	68	1	1	10	4	2	5	1	3	1	3	1	1	1	2	1	3	2	2	1	4	1	1	1	1	2	2	2	1	1	2	2	3	2	2	2	2	2	2	1	2	3	2	1	1	4	1
324	367	2	80	1	1	1	1	2	5	1	2	1	3	3	3	3	3	3	3	3	2	2	2	2	1	3	1	2	2	2	3	1	2	2	3	2	1	2	2	3	3	2	2	3	2	1	2	4	2
325	344	2	70	2	1	10	2	2	2	1	5	1	1	1	1	1	1	1	1	1	2	1	5	1	1	1	1	2	2	2	1	1	2	2	2	2	2	3	3	1	2	2	2	3	1	1	1	5	1
326	396	2	60	2	3	10	1	2	4	1	5	1	2	3	3	3	2	3	1	1	2	1	1	2	1	2	1	2	2	2	2	1	3	2	2	2	1	2	2	3	2	2	2	2	1	1	1	4	1
327	281	2	58	1	1	1	3	2	1	1	4	2	3	3	3	3	2	2	1	1	2	1	4	1	1	2	1	2	2	2	2	1	2	2	2	2	3	2	1	2	2	2	2	3	1	1	1	4	1
328	660	2	78	1	1	10	1	2	1	1	4	1	3	3	3	3	2	2	1	3	2	2	4	2	1	2	2	2	3	3	2	1	2	1	2	2	2	1	3	3	1	2	2	2	1	1	1	4	1
329	343	1	77	1	1	10	3	2	5	1	4	1	2	1	1	1	2	2	3	3	2	1	5	1	2	1	1	2	2	3	1	1	2	2	3	2	2	4	2	3	2	3	2	4	1	1	1	4	1
330	235	2	57	1	2	1	3	2	5	1	3	1	2	1	1	1	1	1	2	3	2	1	4	1	1	5	1	2	1	2	3	1	2	3	1	2	1	2	3	2	1	2	3	2	2	1	1	5	1
331	878	2	68	1	1	1	1	1	5	1	4	1	3	1	1	1	2	1	1	1	2	1	2	1	1	3	1	2	2	2	3	1	2	3	2	3	2	3	1	3	2	1	2	4	1	1	1	4	1
332	897	2	81	1	1	10	1	1	5	1	3	1	3	3	3	3	2	1	3	3	2	2	4	2	1	4	2	2	2	1	3	1	3	2	2	3	3	2	2	3	1	2	2	3	2	2	1	4	1
333	697	2	62	1	1	10	2	2	1	3	3	1	2	1	1	1	1	1	2	3	2	2	2	1	1	5	1	2	1	3	3	1	2	1	2	1	1	2	3	1	1	1	2	3	1	3	1	5	1
334	658	2	59	1	3	1	2	2	5	1	3	1	2	1	1	1	1	1	1	1	2	1	4	1	1	4	1	2	1	2	1	1	1	3	1	2	2	3	1	3	3	1	2	3	1	1	1	5	1
338	1074	2	70	1	2	10	2	2	2	1	4	1	2	1	1	1	2	1	2	3	2	2	1	1	1	4	1	2	1	1	2	1	2	3	2	1	2	1	2	3	2	1	2	3	1	2	1	4	1
339	613	1	68	2	1	10	2	2	4	1	4	1	2	1	1	1	1	1	2	1	2	1	4	1	1	1	1	2	1	2	3	1	3	1	2	1	2	1	1	3	1	2	1	4	1	1	1	4	1
340	604	2	75	2	1	10	1	2	2	1	4	1	3	2	2	1	1	1	3	3	2	1	5	1	1	4	1	1	1	2	2	1	3	3	1	1	2	3	1	4	2	1	1	4	1	2	1	4	1
341	544	1	78	1	1	10	1	2	1	1	5	1	1	1	1	1	1	1	2	2	2	2	1	1	3	2	1	2	1	2	2	1	3	3	3	2	1	1	2	3	1	2	2	3	1	3	1	5	1
342	615	2	64	1	2	1	3	2	2	3	4	1	2	1	1	1	1	1	1	3	2	1	5	1	1	5	1	1	1	3	1	1	2	4	1	1	1	4	1	2	1	1	3	4	1	1	1	5	1
343	751	2	73	2	1	10	1	2	2	1	4	1	2	1	1	1	1	1	2	1	2	2	4	1	1	1	1	2	1	1	2	1	2	2	3	2	2	2	1	2	1	2	3	3	1	1	1	5	2
344	1112	2	68	2	3	10	2	2	2	1	3	1	1	1	1	1	1	1	1	1	2	1	3	1	2	1	1	2	2	2	1	1	3	3	3	1	3	3	1	4	1	1	3	4	1	1	1	5	1
345	764	2	72	2	1	10	1	2	2	1	4	1	2	1	1	1	1	1	2	3	2	1	4	2	1	3	1	1	1	2	2	1	2	3	2	1	1	2	3	2	1	1	3	2	1	1	2	5	1
346	690	2	70	2	2	10	1	2	2	1	4	1	3	1	1	1	3	1	2	1	2	1	3	2	1	3	1	1	1	2	2	1	2	3	2	2	1	1	1	3	1	1	2	2	1	1	1	5	1
347	1141	2	77	2	1	10	1	2	5	1	2	1	3	3	3	3	2	2	3	3	2	2	4	2	1	3	2	1	1	2	3	2	1	3	2	2	1	3	2	3	1	2	3	3	2	3	1	5	1
348	809	2	65	2	2	1	3	1	5	3	4	1	2	2	2	2	2	2	2	2	2	3	3	3	3	3	3	2	2	3	3	2	3	2	3	3	2	3	2	3	3	2	2	3	3	3	3	3	3
349	935	1	72	2	1	10	3	2	1	1	4	1	1	1	1	1	1	1	1	1	2	1	4	1	2	1	4	1	1	2	2	1	2	1	2	2	1	3	2	3	1	2	1	3	1	2	1	5	1
350	693	1	63	1	1	10	2	2	2	1	4	1	1	1	1	1	1	1	1	3	2	1	4	1	2	2	1	2	2	3	2	1	2	3	2	2	1	2	2	3	1	1	2	3	2	3	2	5	1
351	665	2	77	1	2	10	1	2	2	1	3	1	1	1	1	1	2	1	3	3	2	1	2	1	1	3	1	1	1	1	2	1	2	1	2	2	3	3	3	3	2	2	2	4	1	2	2	5	1
352	1130	1	65	1	1	1	1	2	1	1	5	1	2	1	1	2	1	1	3	2	2	2	5	2	1	3	1	2	1	1	1	1	2	1	1	2	1	1	2	3	2	1	3	3	1	1	1	5	1
353	543	1	68	1	1	10	1	2	1	1	3	1	2	1	1	1	1	1	1	2	2	1	4	1	1	1	2	2	1	2	3	1	1	2	3	1	2	1	2	3	1	1	2	3	1	1	1	5	1
354	644	2	66	1	1	1	1	2	2	1	5	1	3	2	2	2	1	1	3	2	2	2	4	1	1	4	1	2	1	2	3	1	2	3	2	1	2	3	3	2	1	1	3	4	1	1	1	4	1
355	577	2	62	1	1	1	2	2	1	1	4	1	2	1	1	1	2	1	3	1	2	1	5	2	1	4	1	1	2	2	1	1	2	2	1	3	2	1	2	3	1	2	1	2	1	1	1	5	1
356	822	2	69	1	1	1	1	2	1	1	4	1	2	1	1	1	1	1	3	2	2	1	4	1	1	3	1	1	2	2	1	1	2	3	3	1	2	1	2	3	1	1	1	3	1	3	1	4	1
357	881	2	63	2	3	10	3	2	1	3	3	1	1	1	1	1	1	1	1	1	2	1	4	1	3	4	1	1	1	2	2	1	2	2	3	1	1	1	3	3	1	1	2	4	1	1	1	5	1
358	63	2	69	1	1	12	1	2	2	1	5	2	2	2	2	2	1	1	1	1	2	2	2	2	2	2	2	2	2	2	2	2	2	2	2	3	3	3	3	2	2	2	3	3	1	1	1	1	2
360	71	1	66	1	2	1	3	2	5	3	1	2	2	2	2	2	1	1	1	1	2	2	2	2	2	2	2	2	2	2	2	2	2	2	2	3	3	3	3	2	2	2	3	3	2	2	2	2	2
361	86	1	66	1	1	1	1	1	2	1	5	1	1	1	1	1	1	1	1	1	2	1	1	1	5	5	1	2	2	2	2	2	2	2	2	4	4	2	2	2	2	2	2	2	3	3	3	3	3
363	463	1	80	2	2	10	4	1	2	1	5	2	2	2	2	3	3	3	2	3	2	2	4	2	2	3	2	3	2	2	3	2	3	3	2	3	2	2	3	3	2	2	3	3	3	2	2	4	2
364	562	2	79	1	1	11	2	2	4	1	4	2	3	3	3	3	3	3	2	3	2	1	3	2	2	2	1	3	3	2	3	2	2	3	2	3	3	3	3	3	2	3	3	3	2	2	2	3	2
365	571	2	76	2	2	11	2	1	5	1	4	2	2	2	2	2	2	2	2	2	2	1	3	2	2	2	2	2	3	2	2	2	2	3	2	3	3	3	3	3	2	2	3	3	2	2	2	3	2
366	583	2	68	2	2	10	3	2	2	1	4	2	2	2	2	2	2	2	2	2	2	1	4	2	2	2	2	2	3	2	3	2	3	3	3	3	2	3	3	3	2	2	3	3	2	2	2	4	2
367	262	1	61	1	1	1	2	2	2	3	1	2	1	1	1	1	1	1	1	1	2	1	1	1	1	1	1	2	2	2	1	2	2	2	2	2	2	1	2	1	2	2	1	1	1	1	1	3	2
1	344	2	69	1	2	1	1	2	2	1	3	1	2	2	2	2	2	2	1	2		1	2	2	2	2	1	3	3	2	2	2	2	2	3	3	3	3	2	3	3	3	2	3	2	1	1	2	1
2	120	2	54	2	1	1	3	2	4	1	5	2	2	2	2	2	2	2	2	2		2	2	2	2	2	2	3	3	3	3	3	3	3	3	3	3	3	3	3	3	3	3	3	3	3	3	3	3
3	890	1	72	2	1	10	3	2	1	3	2	2	3	3	2	3	3	3	3	3		2	4	2	2	4	2	3	2	3	2	2	4	2	3	3	3	3	1	3	3	3	2	1	2	2	2	5	1
4	319	1	64	2	1	1	3	2	2	1	5	1	2	2	2	2	2	2	1	1		2	2	2	2	2	2	2	2	2	2	1	1	2	2	2	1	2	2	2	1	2	2	1	2	2	2	2	2
5	742	2	64	2	1	10	2	2	2	1	4	2	2	3	2	2	2	2	2	3		2	4	2	1	3	1	2	3	2	3	2	3	2	2	3	2	3	3	3	2	2	3	3	1	1	1	3	1
6	858	2	69	2	1	10	3	2	2	1	1	1	1	1	1	1	1	1	1	1		1	2	1	2	2	2	1	1	1	3	2	3	2	1	2	2	3	3	3	1	2	2	3	2	3	2	5	1
7	217	2	56	1	1	10	3	2	4	1	3	1	2	2	2	2	2	2	2	2		2	2	2	2	2	2	2	2	2	2	2	2	2	2	2	2	2	2	2	2	2	2	2	2	2	2	2	2
8	659	1	76	1	1	10	2	2	4	1	3	2	3	2	2	1	2	1	1	3		2	2	1	2	2	1	2	2	3	3	2	3	3	2	2	1	1	4	3	3	2	3	3	2	3	2	2	1
9	192	2	79	1	1	10	3	2	2	1	3	1	2	2	2	2	2	2	2	2		2	2	2	2	2	2	2	2	2	2	2	2	2	2	2	2	2	2	2	2	2	2	2	2	2	2	2	2
10	327	2	58	1	1	1	2	2	2	1	1	2	2	2	1	1	1	1	1	1		1	2	1	3	2	1	2	2	2	2	2	2	2	2	2	2	3	3	2	2	2	3	3	1	1	1	4	1
11	780	1	70	1	1	1	3	2	2	1	1	2	2	1	2	2	3	3	2	3		2	2	2	2	2	2	3	2	3	2	2	3	3	3	3	2	2	3	3	2	2	3	3	2	2	2	4	2
12	434	2	60	1	1	10	2	2	4	1	2	2	2	2	2	2	2	2	2	3		1	2	2	1	2	1	3	3	4	2	1	3	3	3	3	3	3	2	3	2	2	3	3	3	1	1	4	1
13	254	1	59	1	1	10	3	2	1	1	1	1	2	2	2	2	2	2	2	2		2	2	2	2	2	2	2	2	2	2	2	2	2	2	2	2	2	2	2	2	2	2	2	2	2	2	2	2
14	178	2	67	2	1	10	3	2	2	1	3	2	2	2	2	2	2	2	2	2		2	2	2	2	2	2	3	2	2	2	2	3	3	3	3	2	2	3	2	3	3	3	3	3	3	3	3	3
15	433	1	67	1	1	10	3	2	4	1	1	2	3	2	2	2	3	2	2	3		2	3	2	2	2	2	3	2	2	2	2	3	2	2	3	4	3	3	3	3	2	3	3	3	3	3	3	2
16	640	2	68	1	2	1	3	2	4	1	4	2	3	3	3	3	3	3	2	3		2	1	2	1	2	2	3	3	3	2	2	3	3	3	3	4	4	2	3	3	2	3	4	2	2	2	3	2
17	739	1	78	2	3	10	2	2	4	1	2	1	1	1	2	2	2	2	2	2		1	3	2	3	4	1	2	2	2	2	1	2	2	2	3	3	3	2	3	2	2	2	3	2	2	1	4	1
18	953	2	70	2	2	1	2	2	2	1	1	1	1	1	1	1	2	3	3	3		1	2	2	1	2	1	2	2	3	3	2	3	3	3	2	3	2	4	3	2	2	3	2	1	1	1	1	1
19	517	2	65	2	1	1	4	2	2	1	5	1	2	2	1	1	3	2	2	3		1	3	1	1	3	1	2	2	2	2	2	3	2	3	3	3	3	3	3	2	2	3	2	1	2	1	3	1
20	1198	1	78	2	2	10	2	2	4	1	4	1	2	1	1	1	1	1	1	3		1	2	2	2	2	2	2	2	3	3	1	3	3	3	4	3	3	2	3	1	2	3	3	1	1	1	5	1
21	560	2	40	1	2	1	4	2	4	3	1	2	2	2	2	2	2	3	1	2		2	2	2	2	2	2	3	2	2	3	2	3	3	3	3	2	2	3	3	2	2	3	3	2	2	2	4	2
22	694	2	50	1	1	1	2	2	4	1	2	1	1	1	1	1	1	1	1	1		1	1	1	1	1	1	1	1	1	1	1	4	1	1	4	4	4	4	4	1	4	4	4	2	2	1	4	1
23	900	2	44	2	3	1	2	2	4	1	1	2	3	2	3	3	3	2	3	3		2	2	2	2	2	2	3	2	3	3	2	2	3	2	3	3	2	3	3	3	2	3	3	2	2	2	3	2
24	132	2	69	1	1	12	2	1	2	1	2	1	2	2	2	2	2	2	2	2		2	2	2	2	2	2	2	2	2	2	2	2	2	2	2	2	2	2	2	2	2	2	2	2	2	2	2	2
25	171	2	66	1	2	12	1	2	2	1	1	1	1	1	1	1	1	1	1	1		1	5	1	4	4	1	1	1	1	1	1	1	1	1	1	1	1	1	1	1	1	1	1	1	1	1	1	1
26	581	2	59	2	1	10	1	2	2	1	5	2	3	2	2	2	2	1	1	3		1	1	1	1	1	1	4	1	4	2	2	4	4	4	4	4	4	4	4	4	1	4	4	1	1	1	5	1
27	507	2	75	2	2	10	3	2	2	1	5	2	2	2	2	2	1	1	1	2		1	4	2	2	2	1	2	2	2	3	2	2	2	2	2	2	2	3	2	2	2	3	3	2	1	1	3	1
28	1785	2	78	2	2	1	2	2	4	1	2	1	1	1	1	2	1	1	1	1		1	2	1	2	2	2	2	2	2	3	2	2	2	2	2	2	3	3	2	2	2	2	2	2	1	1	5	2
29	1639	1	70	1	1	12	1	2	4	1	3	1	2	2	2	2	2	2	2	2		2	3	2	3	2	2	3	2	2	3	2	3	3	3	3	3	3	3	3	3	3	3	3	2	3	2	2	2
30	446	1	68	1	1	10	1	2	2	3	1	2	2	2	2	2	2	2	2	2		2	2	2	2	2	2	3	3	3	3	3	3	3	3	3	3	3	3	3	3	3	3	3	2	2	2	2	2
31	231	2	59	2	1	10	1	2	2	1	5	2	3	2	1	1	2	2	1	2		1	2	1	1	1	1	4	4	4	4	1	4	4	4	4	4	4	4	4	4	4	4	4	3	2	2	3	4
32	81	2	69	1	1	12	2	1	1	1	2	1	2	2	2	2	2	2	2	2		2	2	2	2	2	2	2	2	2	2	2	2	2	2	2	2	2	2	2	2	2	2	2	2	2	2	2	2
33	313	2	51	1	1	11	1	2	4	1	1	1	2	2	2	2	2	2	2	2		2	2	2	2	2	2	3	2	3	3	2	3	3	2	3	3	3	2	3	2	3	3	3	2	2	2	2	2
34	296	1	43	1	2	1	2	2	4	1	2	2	2	3	2	1	2	2	2	2		2	2	2	2	2	3	3	3	3	3	2	3	3	2	3	3	3	3	3	3	3	3	3	3	3	3	3	2
35	433	1	35	1	1	1	3	1	4	1	2	1	2	2	1	1	2	2	2	1		1	1	1	1	1	1	3	3	3	3	2	3	3	2	3	3	3	3	3	3	2	3	3	2	1	1	3	1
36	314	1	64	1	2	1	1	2	2	1	1	1	2	1	1	1	1	1	1	1		1	1	1	1	1	1	1	3	3	3	1	3	3	3	3	3	3	3	3	1	2	3	2	3	2	2	5	1
37	344	1	45	1	2	1	2	2	4	3	2	1	2	2	2	2	2	2	2	2		2	2	2	2	2	2	3	3	3	3	3	3	3	3	3	3	3	3	3	3	3	3	3	3	3	3	3	3
38	537	1	54	1	2	12	3	2	2	1	1	2	2	2	2	2	3	2	2	2		5	5	5	5	5	5	4	4	3	4	2	2	3	3	3	3	4	4	4	4	4	4	4	2	2	2	2	2
39	938	2	55	1	1	1	2	1	2	1	4	1	2	3	3	2	2	1	2	2		2	2	1	2	2	1	2	3	2	3	2	2	3	2	2	3	2	3	3	2	2	3	3	2	3	3	4	2
40	228	1	27	1	1	1	2	2	4	4	3	1	3	2	2	2	2	2	2	2		3	3	3	3	3	3	3	3	3	3	3	3	3	3	3	3	4	4	3	3	2	3	3	4	4	4	2	3
41	473	2	44	2	1	11	1	2	4	3	5	2	1	1	1	1	1	1	2	2		2	3	1	4	3	2	2	3	2	3	1	4	2	2	3	3	2	3	3	2	2	2	3	2	2	2	4	2
42	643	2	68	1	2	11	1	2	2	1	3	2	2	2	1	1	2	2	1	1		1	4	1	1	2	1	3	2	3	2	3	2	1	3	2	2	3	2	3	2	2	3	3	2	1	1	5	1
43	111	2	52	2	1	1	1	2	1	2	1	2	1	1	1	1	1	1	1	1		1	1	1	1	1	1	4	4	4	4	4	4	4	4	4	4	4	4	4	4	4	4	4	1	1	1	1	1
44	73	2	25	2	1	1	2	1	2	1	1	1	1	1	1	1	1	1	1	1		1	1	1	1	1	1	4	4	4	4	4	4	4	4	4	4	4	4	2	2	2	2	2	2	2	2	2	2
45	646	1	56	1	1	1	2	2	4	3	1	2	3	2	2	2	2	2	2	2		2	2	2	2	2	2	3	3	3	3	3	3	3	3	3	3	3	3	3	3	3	3	3	2	2	2	3	2
46	750	1	35	1	1	1	4	1	2	1	3	1	2	2	2	1	2	2	1	2		1	2	1	3	3	1	3	3	3	3	1	3	2	2	3	3	3	3	3	2	2	3	3	3	3	2	4	2
47	1210	2	61	1	1	11	1	1	4	1	5	1	1	1	1	1	1	1	1	1		1	1	1	1	1	1	4	4	4	4	3	4	4	4	3	4	4	4	4	4	4	4	4	1	1	1	1	1
48	277	1	69	1	1	11	1	2	2	1	1	1	1	1	1	1	1	1	1	1		2	2	2	2	2	2	2	2	2	2	2	2	2	2	2	2	2	2	2	2	2	2	2	2	2	2	2	2
49	73	2	85	1	2	1	3	2	4	1	5	1	2	2	2	2	2	2	2	2		3	3	3	3	3	3	3	3	3	3	3	3	3	3	3	3	3	3	3	3	3	3	3	3	3	3	3	3
50	115	1	43	1	1	1	4	1	4	3	2	1	2	2	2	2	2	2	2	2		3	3	3	3	3	3	3	3	3	3	3	3	3	3	3	3	3	3	3	3	3	3	3	1	1	1	1	2
52	93	2	55	2	1	1	3	2	4	3	3	1	2	2	2	2	2	2	2	2		3	3	3	3	3	3	4	4	4	4	4	4	3	3	3	3	3	3	3	3	3	3	3	3	3	3	3	3
53	2854	2	66	1	1	1	1	2	2	1	3	1	2	2	3	3	2	2	2	3		2	2	2	1	2	2	3	3	2	2	2	3	2	3	3	2	3	3	3	2	2	3	2	1	1	1	3	1
54	569	2	63	2	1	10	2	2	4	1	5	1	3	3	1	1	1	1	1	3		1	5	5	1	3	1	1	1	2	4	1	3	2	3	3	1	1	4	1	1	1	4	1	1	1	1	5	1
55	352	2	48	2	3	1	3	2	4	3	1	2	3	1	1	1	1	1	1	1		1	1	1	2	1	1	3	3	2	2	2	2	3	2	3	2	2	3	3	2	2	2	2	1	1	1	4	1
56	327	1	54	2	3	1	3	2	1	3	2	2	2	1	1	1	1	1	1	1		1	4	1	3	5	1	1	2	3	3	1	3	3	3	3	1	2	3	3	2	2	4	3	2	1	2	3	2
57	325	2	65	1	1	1	2	2	1	1	1	2	1	2	1	1	1	1	1	2		1	2	1	2	1	1	2	2	1	3	1	1	1	3	1	1	1	4	1	4	1	1	1	1	1	1	5	1
58	272	1	68	1	1	10	2	2	2	1	3	1	1	1	1	1	1	1	1	3		1	5	1	1	2	1	1	1	1	1	1	1	1	1	1	1	1	1	1	1	1	1	1	1	1	3	5	1
59	594	1	46	1	1	1	4	2	4	1	2	2	3	2	2	1	2	2	1	3		2	2	2	1	3	2	2	3	3	2	2	3	3	2	2	2	2	3	3	2	2	3	2	3	2	2	5	2
60	187	2	68	2	1	10	2	2	4	1	1	1	1	1	1	1	1	1	1	2		2	5	1	1	2	2	2	1	1	1	1	1	1	2	2	2	2	2	2	2	2	3	2	2	2	3	1	1
61	196	1	53	2	2	1	2	2	4	1	5	1	2	2	2	2	2	2	2	2		2	2	2	2	2	2	2	3	2	3	2	2	2	2	2	2	2	3	3	2	2	2	2	2	2	2	2	2
62	965	2	60	2	2	10	2	2	4	1	1	2	3	3	3	3	3	3	3	3		2	3	2	2	3	2	2	2	2	3	3	3	2	2	2	2	3	3	2	2	2	3	2	2	3	2	3	2
63	209	2	58	1	1	12	2	2	2	3	5	2	3	3	3	3	3	3	3	3		1	2	1	1	1	1	3	3	3	3	1	1	2	2	3	3	3	3	3	3	3	3	3	3	3	3	3	3
64	248	1	53	1	1	1	2	2	4	1	1	1	1	1	1	1	1	1	1	1		1	5	1	1	1	1	1	1	2	2	1	1	1	1	1	1	2	4	1	1	2	2	1	1	1	1	1	1
65	1084	1	71	1	1	1	2	1	2	1	5	1	2	2	2	2	2	2	3	2		1	2	1	3	2	2	2	2	4	3	2	2	3	2	3	2	3	3	3	4	2	2	2	1	2	1	5	1
66	482	2	40	1	1	11	1	2	4	4	4	2	2	2	2	2	1	1	1	3		1	1	1	1	1	1	4	1	1	1	1	4	4	1	1	1	4	4	1	1	1	1	1	1	1	1	5	1
67	124	2	66	1	1	1	2	2	4	1	1	1	1	2	1	1	1	1	1	1		1	1	1	1	1	2	1	1	1	1	1	1	1	1	1	1	1	4	1	1	2	2	1	1	1	1	1	2
68	104	2	61	1	1	11	1	2	4	1	1	1	1	1	1	1	1	2	1	1		2	1	2	2	1	1	1	1	1	1	1	1	1	1	1	1	1	1	1	1	1	1	1	1	1	1	1	1
69	636	1	50	1	2	1	2	2	2	1	1	2	2	3	2	3	2	2	3	3		2	3	1	2	3	2	2	2	4	4	3	3	4	4	4	4	4	4	4	4	4	4	4	2	1	1	4	1
70	639	1	63	1	1	1	1	2	4	1	1	2	2	3	3	3	3	3	3	3		3	3	3	3	3	3	2	2	2	2	2	2	2	2	3	3	3	2	3	3	3	3	3	3	3	3	3	3
71	124	2	51	1	1	1	1	2	4	1	1	1	1	1	1	1	1	1	2	1		1	2	1	1	1	2	1	1	1	1	1	1	1	1	1	1	1	2	2	1	1	2	1	1	1	1	1	1
72	1046	1	79	1	1	1	1	2	4	1	5	2	3	2	2	3	2	3	1	3		2	4	1	3	3	1	2	1	3	2	2	4	4	3	2	1	3	4	3	2	1	3	4	3	2	1	2	1
73	240	1	48	1	1	1	1	2	4	1	5	1	1	1	1	1	1	1	1	1		1	1	1	1	1	1	2	2	1	2	1	1	2	2	1	1	1	1	1	1	1	1	1	1	1	1	1	2
74	211	1	67	1	1	1	1	2	2	1	1	1	1	1	1	2	1	1	1	1		1	1	2	1	2	1	1	2	1	2	1	2	1	1	2	1	1	1	1	1	1	1	1	1	1	1	1	1
75	767	2	68	1	1	1	1	1	4	1	5	2	2	2	1	1	2	1	2	3		3	2	3	2	3	2	3	3	3	3	2	3	2	2	3	3	3	3	2	3	2	2	2	4	3	5	5	2
76	117	2	73	2	1	1	1	2	4	1	5	1	1	1	1	1	1	1	1	1		1	1	1	2	1	3	1	1	1	2	1	1	1	1	1	1	1	1	1	1	2	2	1	1	1	1	1	1
77	1005	2	74	1	1	12	1	1	2	1	5	1	2	3	2	2	2	3	2	3		2	2	2	2	2	2	2	2	2	3	2	3	2	3	3	2	3	3	3	2	3	3	3	2	2	2	4	2
78	271	2	65	2	2	12	1	2	4	1	5	2	3	3	3	3	3	3	3	3		2	2	2	2	2	2	2	2	2	2	2	2	2	2	2	2	2	2	2	2	2	2	2	4	4	4	4	4
79	392	2	65	1	1	11	2	2	4	1	1	1	2	2	2	2	2	2	2	2		2	4	2	2	3	2	3	3	3	3	2	2	2	2	3	3	3	2	3	3	3	2	3	3	3	3	3	3
80	118	2	70	2	1	1	2	2	2	1	5	1	1	1	1	1	1	2	1	1		1	1	1	1	1	1	1	1	1	1	1	1	1	1	1	1	1	1	1	1	1	1	1	1	1	1	1	1
81	318	1	70	1	1	11	3	2	4	1	1	2	2	2	2	2	2	2	2	2		2	2	2	2	2	2	4	4	4	4	4	4	4	4	4	4	4	4	4	4	4	4	4	1	1	1	3	1
82	432	2	33	1	3	1	2	2	4	1	1	2	3	3	3	3	3	3	2	3		2	3	3	4	3	3	3	3	3	3	2	3	2	2	3	3	3	2	3	3	3	2	3	4	3	4	4	4
83	484	2	65	2	1	12	1	2	1	1	3	1	2	2	2	2	2	2	2	2		1	1	1	1	1	1	2	2	2	3	2	3	3	3	2	2	3	3	3	2	2	3	3	1	1	1	5	2
84	1980	2	72	1	1	11	1	2	2	1	1	1	2	2	2	2	2	2	3	3		2	2	2	1	2	2	2	2	2	2	2	3	2	2	2	3	2	3	3	2	2	2	2	3	1	1	5	1
85	465	1	73	1	1	1	1	2	4	1	1	2	1	1	1	1	1	1	1	1		1	1	1	1	1	1	3	1	3	4	2	4	3	2	3	3	4	3	2	4	3	2	3	3	5	4	3	3
86	1108	2	69	2	3	10	1	2	1	1	1	2	2	1	1	1	1	1	1	1		2	3	2	3	2	2	2	3	2	3	2	2	2	2	3	3	3	3	3	3	2	2	2	2	3	2	2	2
87	200	1	54	1	1	1	4	2	1	1	4	1	2	1	2	2	2	2	2	2		2	2	2	2	2	2	2	3	2	2	2	2	2	3	3	3	3	3	3	3	3	3	3	3	3	3	3	3
88	215	1	34	1	1	1	1	2	4	1	2	1	2	1	1	1	1	2	1	1		2	2	2	2	2	2	2	2	2	2	2	2	2	2	2	2	2	2	2	2	2	2	2	2	2	2	2	2
89	412	1	28	1	1	1	2	1	4	1	5	2	2	2	2	1	2	2	2	2		1	1	1	1	1	1	1	1	1	1	1	1	1	1	1	1	1	1	1	1	1	1	1	2	2	2	3	1
90	144	1	74	1	1	1	1	2	4	1	5	1	1	1	1	1	1	1	2	1		1	1	1	2	1	1	2	1	1	1	2	1	1	2	1	1	1	1	1	1	1	1	1	1	1	1	1	1
91	131	2	62	1	1	1	1	2	4	1	1	1	1	1	1	1	2	1	2	1		1	1	2	1	2	1	2	1	2	1	2	1	2	1	1	1	1	1	1	1	1	1	1	1	1	1	1	2
92	253	2	65	1	1	1	1	2	4	1	1	1	1	1	1	1	1	1	1	1		1	2	1	1	1	1	2	2	2	2	1	2	2	2	2	2	2	2	2	2	2	2	2	1	1	1	1	1
93	2229	2	66	1	1	10	1	2	4	1	2	2	1	1	1	1	1	2	1	2		1	1	1	1	1	1	2	1	2	1	1	1	1	1	1	1	1	1	1	1	1	1	1	1	1	1	1	1
94	224	1	34	2	3	1	3	2	4	1	1	2	2	1	1	2	1	1	1	1		2	2	2	2	2	2	3	3	3	3	1	1	1	1	3	3	3	3	3	3	3	3	3	2	2	2	2	1
95	160	2	61	1	1	11	1	2	2	1	5	2	1	1	1	1	1	1	1	1		1	1	1	1	1	1	3	3	3	3	3	3	3	3	3	3	3	3	3	3	3	3	3	2	2	2	2	2
96	146	2	73	1	1	1	1	2	4	1	1	1	1	1	1	1	1	2	1	1		1	1	2	1	2	1	1	2	1	2	2	1	2	1	2	1	2	1	2	1	1	2	1	1	2	2	1	2
97	697	1	28	1	3	1	1	2	4	1	1	2	1	1	1	1	1	1	1	1		1	1	1	1	1	1	1	1	1	1	1	1	1	1	1	1	1	1	1	1	1	1	1	1	1	1	1	1
98	148	2	62	2	3	1	1	2	4	1	1	1	1	1	2	1	2	1	1	1		1	1	1	1	1	1	1	2	1	1	1	1	2	1	1	1	1	1	1	1	1	1	1	1	1	1	1	1
99	88	2	72	1	1	1	1	2	2	1	4	1	1	1	1	1	1	1	1	1		2	1	1	1	2	1	2	1	1	1	1	1	1	1	1	1	1	1	1	1	1	1	1	1	1	1	1	1
100	84	2	66	1	1	1	1	2	4	1	5	2	1	1	2	1	1	1	1	1		1	1	1	1	1	1	1	1	1	1	1	1	1	1	1	2	1	1	1	1	1	1	1	1	1	2	1	1
101	460	2	38	1	1	1	2	2	4	1	2	2	1	1	1	1	1	1	1	1		1	5	1	5	5	2	3	2	3	3	3	3	3	3	3	3	3	3	3	3	3	3	3	2	2	2	2	2
102	154	2	68	1	1	1	2	2	4	1	1	2	1	1	2	1	1	1	1	1		1	2	1	1	2	1	1	1	1	1	1	1	1	1	2	1	2	1	1	1	1	1	1	1	1	1	1	1
103	133	1	34	2	3	1	3	2	4	3	1	2	2	2	2	2	2	2	2	2		2	2	2	2	2	2	2	2	2	2	2	2	2	2	2	2	2	2	2	2	2	2	2	2	2	2	2	2
104	223	1	34	2	2	1	2	2	4	1	5	2	2	2	2	2	2	2	2	2		2	2	2	2	2	2	2	2	2	2	2	2	2	2	2	2	2	2	2	2	2	2	2	2	2	2	2	2
105	185	1	40	2	3	1	3	2	4	1	2	2	2	1	1	1	2	1	1	1		1	1	1	1	1	1	4	4	4	4	3	3	3	3	3	3	3	3	3	3	3	3	3	3	3	3	3	3
106	236	2	33	2	2	1	4	2	4	3	5	1	2	2	2	2	2	2	2	2		2	2	2	2	2	2	2	2	2	2	2	2	2	2	2	2	2	3	2	2	2	2	3	2	2	2	2	2
107	156	1	65	1	3	10	4	1	4	1	1	1	1	1	1	1	1	1	1	1		1	1	1	1	1	1	1	1	1	1	1	1	1	1	1	1	1	1	1	1	1	1	1	1	1	1	1	1
108	124	2	65	1	1	1	1	2	5	4	1	1	1	1	1	1	1	1	1	1		1	1	1	2	1	2	1	2	1	2	1	2	1	2	1	2	1	2	1	2	1	2	1	1	2	1	2	1
109	222	1	30	2	2	1	4	2	4	1	4	1	2	1	1	1	1	2	1	1		1	1	1	1	1	1	1	1	1	1	1	1	1	4	4	4	4	4	4	1	1	4	2	1	1	1	1	1
110	123	1	30	2	3	1	4	2	4	1	2	2	2	2	2	2	2	2	2	2		2	2	2	2	2	2	3	3	3	3	2	3	3	3	3	3	3	3	3	3	3	3	3	4	4	4	4	4
111	123	2	65	1	1	1	1	2	4	1	1	1	1	1	1	1	1	2	1	2		1	2	1	2	1	2	1	2	1	1	1	1	1	1	1	1	1	1	1	2	1	2	1	1	2	1	2	1
112	242	1	31	2	3	1	4	2	4	3	1	2	2	2	2	2	2	2	2	2		2	2	2	2	2	2	3	3	3	3	2	3	3	3	3	3	3	3	3	3	3	3	3	2	2	2	2	2
113	87	2	66	1	1	12	4	2	4	1	2	2	1	1	1	1	1	1	1	1		1	1	1	1	1	1	1	1	1	1	1	1	1	1	1	1	1	1	1	1	1	1	1	1	1	1	1	1
114	125	2	67	2	2	10	4	2	4	1	2	2	1	1	1	1	1	1	1	1		1	1	1	1	1	1	1	1	1	1	1	1	1	1	1	1	1	1	1	1	1	1	1	1	1	1	1	1
115	172	2	74	2	1	1	1	2	2	1	5	1	1	2	1	1	2	1	2	1		1	2	1	2	1	2	1	2	1	2	1	2	1	2	1	2	1	2	1	2	1	1	2	1	2	1	1	2
116	473	1	51	1	2	1	2	2	2	1	5	1	1	2	1	1	1	1	1	2		1	2	1	2	1	1	2	2	2	1	1	3	2	3	3	1	2	2	3	2	2	3	2	1	1	1	4	1
117	112	1	57	1	1	1	1	2	4	1	2	1	1	1	2	1	1	2	1	2		2	1	2	1	2	1	2	1	2	1	1	1	1	1	1	1	1	1	1	1	1	1	1	1	1	1	1	1
118	181	1	38	1	2	1	3	1	4	1	5	1	1	1	1	1	1	1	1	1		1	1	1	1	1	1	4	4	4	4	4	4	4	4	4	4	4	4	4	4	4	4	4	1	1	1	2	1
119	104	1	42	1	1	1	1	2	4	1	2	1	1	2	1	2	1	1	1	1		1	1	1	1	1	1	1	1	1	1	1	1	1	1	1	1	1	1	1	1	1	1	1	1	1	1	1	1
120	84	1	60	2	2	1	4	2	4	1	3	1	1	1	1	1	1	1	1	1		1	1	1	1	1	1	1	1	1	1	1	1	1	1	1	1	1	1	1	1	1	1	1	1	1	1	1	1
121	635	2	33	1	1	1	1	2	4	1	2	2	2	2	2	2	2	2	2	2		1	3	2	1	2	2	2	2	2	2	2	2	2	3	2	2	2	3	2	2	2	3	3	2	2	2	4	2
122	282	1	63	1	1	1	3	2	4	1	3	2	2	1	1	1	1	1	1	1		1	1	1	1	1	1	2	1	1	3	1	1	2	2	2	2	2	3	2	3	2	3	2	3	3	3	3	3
123	563	1	41	2	3	1	2	1	4	1	1	2	1	1	1	1	1	1	1	1		1	1	1	1	1	1	1	1	1	1	1	1	1	1	1	1	1	1	1	1	1	1	1	1	1	1	1	1
124	147	2	21	1	3	1	1	1	4	1	3	2	1	1	1	1	1	1	1	1		1	1	1	1	1	1	1	1	1	1	1	1	1	1	1	1	1	1	2	2	2	2	3	3	3	3	3	3
125	63	2	65	1	3	1	4	2	4	1	1	1	1	1	1	1	1	1	1	1		1	1	1	1	1	1	1	1	1	1	1	1	1	1	1	1	2	1	2	1	2	1	2	1	2	1	2	2
126	144	2	35	2	1	12	2	2	4	2	2	2	2	2	2	2	2	2	2	2		3	3	3	3	3	3	1	1	1	1	1	1	1	1	1	1	1	1	1	1	1	1	1	1	1	1	1	1
127	113	2	65	2	3	1	1	2	4	1	1	2	1	1	1	1	1	1	1	1		1	1	1	1	1	1	3	3	3	3	3	3	3	3	3	3	3	3	3	3	3	3	3	3	3	3	3	3
128	142	1	42	1	1	1	2	1	4	1	1	1	1	1	1	1	1	1	1	1		1	1	1	1	1	1	1	1	1	1	1	1	1	1	1	1	1	1	1	1	1	1	1	1	1	1	1	1
129	175	2	45	1	1	12	1	1	4	4	1	1	3	3	2	2	2	2	2	2		3	3	3	3	3	3	3	3	3	3	3	3	3	3	3	3	3	3	3	3	3	3	3	3	3	3	3	3
130	1182	2	70	1	1	12	1	2	4	1	1	2	2	1	1	1	2	1	1	2		1	3	2	2	3	2	2	2	2	2	1	2	2	2	2	2	2	2	2	2	2	2	2	3	2	2	5	2
131	191	2	33	2	3	1	4	2	4	1	1	2	2	2	2	2	2	2	2	2		1	5	1	1	5	1	3	3	3	3	3	3	3	3	3	3	3	3	3	3	3	3	3	4	4	4	4	4
132	104	2	73	1	3	1	2	2	4	1	1	1	1	1	1	1	1	2	1	2		2	1	2	1	2	1	2	1	2	1	2	1	2	2	1	2	1	2	1	2	1	2	1	2	2	1	2	1
133	157	1	35	1	3	1	4	2	4	3	1	2	1	1	1	1	1	1	1	1		1	1	1	1	1	1	1	1	1	1	1	1	1	1	1	1	1	1	1	1	1	1	1	1	1	1	1	1
134	109	2	41	2	3	1	3	2	4	1	1	2	1	1	1	1	1	1	1	1		1	1	1	1	1	1	4	4	4	4	4	4	4	4	4	4	4	4	4	4	4	4	4	1	1	1	1	1
135	498	1	71	1	1	1	3	2	2	1	5	1	1	1	1	1	1	1	1	2		1	2	1	4	1	1	1	1	1	1	1	1	1	1	1	1	1	1	1	1	1	1	1	1	1	1	5	1
136	198	1	58	1	1	12	1	2	4	1	1	1	3	2	2	2	2	2	2	2		1	1	1	1	1	1	4	4	4	4	4	4	4	3	4	4	4	4	4	4	4	4	4	3	3	3	3	3
137	1088	1	63	1	2	1	2	2	4	1	5	2	2	2	2	2	2	2	2	2		2	2	2	2	2	2	3	3	3	3	2	2	3	2	3	2	3	3	3	3	2	3	3	2	3	2	3	2
138	84	2	67	2	2	1	4	2	4	1	2	1	1	1	1	1	1	1	1	1		1	1	1	1	1	1	1	1	1	1	1	1	1	1	1	1	1	1	1	1	1	1	1	3	3	3	3	3
139	96	1	65	1	3	1	4	2	4	1	3	1	1	1	1	1	1	1	1	1		1	1	1	1	1	1	1	1	1	1	1	1	1	1	1	1	1	1	1	1	1	1	1	3	3	3	3	3
140	2836	2	67	1	2	1	1	2	4	1	1	1	2	2	1	1	3	1	2	2		5	2	1	3	2	1	2	3	2	3	2	3	4	3	2	3	2	3	3	2	2	3	3	2	2	2	4	2
141	2981	2	67	1	1	1	2	2	2	4	4	2	1	1	1	1	1	1	1	3		1	3	1	1	2	1	1	3	4	3	3	3	3	3	3	1	3	4	2	1	1	4	2	1	1	1	5	1
142	285	2	50	1	1	1	1	2	2	4	2	2	2	2	3	2	2	2	2	2		2	2	2	2	2	2	4	4	2	4	1	4	3	4	4	4	3	4	4	2	2	4	4	1	1	2	1	2
143	208	1	38	1	1	1	1	2	4	4	1	2	1	1	1	1	1	1	1	1		2	2	2	2	2	2	3	2	2	2	2	2	2	2	3	2	2	3	2	3	3	3	2	4	2	2	3	2
144	234	2	45	1	1	1	1	2	4	1	4	1	1	2	1	1	1	1	1	1		2	2	2	2	2	2	3	2	3	3	2	2	2	2	2	3	3	3	3	2	2	2	2	2	2	2	4	2
145	177	1	59	1	1	1	2	2	4	1	1	1	1	2	1	1	1	1	1	1		1	2	2	2	2	2	1	1	2	3	2	2	2	2	2	2	2	3	2	2	2	2	2	2	2	2	2	2
146	151	1	51	1	1	1	2	2	4	1	3	1	1	1	1	1	1	1	1	1		2	2	2	1	2	1	3	1	1	1	1	2	2	2	2	2	2	2	2	2	2	2	2	2	2	2	2	2
147	196	1	57	1	3	1	2	2	2	1	1	2	1	1	1	1	1	1	1	1		1	1	1	1	1	1	1	1	1	1	1	1	1	1	1	1	1	1	1	1	1	1	1	1	1	1	1	1
148	644	1	67	1	2	12	1	2	2	1	5	2	2	2	1	1	1	1	1	1		1	2	1	1	2	2	3	2	2	3	2	2	3	3	3	2	3	3	3	2	2	3	3	1	1	1	3	1
149	333	2	57	1	1	12	2	2	2	1	3	1	2	2	2	2	1	1	1	1		2	2	2	2	2	2	3	3	3	3	4	3	3	3	3	3	3	3	3	3	3	3	3	3	3	3	3	3
150	129	1	46	1	2	10	2	2	4	1	5	1	1	1	1	2	1	1	1	1		2	2	2	2	2	2	2	2	2	2	2	2	2	2	2	2	2	3	2	2	2	2	2	2	2	2	2	2
151	935	2	80	2	2	10	4	1	2	1	5	2	2	2	2	2	2	2	2	2		2	2	2	2	2	2	3	2	3	3	2	3	3	3	3	2	3	3	2	2	2	3	3	3	2	2	3	2
152	167	1	57	1	2	1	3	2	4	1	2	1	1	1	1	1	1	1	1	1		1	1	1	1	1	1	3	3	3	3	2	3	3	2	3	3	3	3	3	2	2	2	3	1	1	1	5	1
153	105	2	56	2	2	1	3	2	4	1	2	1	1	1	1	1	1	1	1	1		1	3	1	1	3	1	3	3	3	3	2	2	2	2	3	2	3	3	3	2	2	2	2	1	1	1	4	1
154	135	1	34	2	2	1	3	2	4	1	2	1	1	1	1	1	1	2	1	1		2	3	2	1	1	2	2	1	2	2	2	3	2	3	3	2	3	3	3	2	2	3	3	1	1	1	1	1
155	177	2	34	1	1	1	2	2	4	1	2	1	2	1	2	1	2	1	1	2		1	1	2	2	2	1	2	1	2	1	2	2	1	2	2	2	2	2	2	3	2	1	2	2	2	3	2	2
156	652	1	56	2	2	1	4	2	4	2	4	1	1	1	2	2	2	2	1	1		1	3	1	1	1	3	1	2	1	3	1	2	1	1	1	1	3	2	2	2	3	2	3	1	1	1	1	1
157	117	2	56	1	2	1	4	2	4	3	4	1	1	1	1	1	2	1	1	2		1	1	1	2	1	1	3	1	1	2	1	2	2	1	2	1	1	2	1	1	3	3	2	1	1	1	1	1
158	139	2	52	1	1	1	3	2	2	3	3	1	2	1	1	2	2	1	1	2		3	4	2	4	3	2	2	3	3	2	2	3	2	2	3	2	2	3	2	2	3	2	2	1	1	2	1	3
159	68	2	45	1	1	1	3	2	5	3	4	1	2	1	1	2	1	2	2	2		2	2	3	3	2	2	3	2	3	1	3	1	2	2	2	1	1	2	2	2	1	2	2	1	2	3	2	3
160	128	1	24	1	3	1	2	1	4	2	3	2	1	1	1	1	1	1	1	1		1	1	1	1	1	1	1	4	1	4	1	1	4	1	1	1	2	3	3	2	3	3	3	5	4	4	4	4
161	113	2	56	1	2	1	3	2	2	2	3	2	2	2	2	3	2	1	2	1		3	2	3	3	2	2	2	3	2	2	3	2	2	3	2	2	3	2	2	1	1	2	3	1	2	2	2	2
162	192	1	57	1	1	1	1	2	2	1	4	1	2	2	1	1	2	1	2	1		2	3	2	2	2	3	3	2	2	3	3	2	2	2	2	2	3	4	1	1	2	2	1	3	2	3	3	3
163	125	1	78	2	2	1	3	1	1	3	4	1	2	1	2	2	1	2	1	2		2	5	3	2	2	1	2	3	2	2	2	2	1	2	2	1	2	2	2	1	1	2	2	2	1	1	1	1
164	211	1	43	1	1	11	2	2	4	1	4	1	2	1	2	2	1	1	2	2		2	2	2	3	2	2	2	2	1	2	3	2	1	2	2	2	3	2	2	3	2	2	3	2	4	3	2	3
165	275	2	43	1	1	1	4	2	4	1	1	2	2	3	1	1	2	3	1	1		2	2	4	3	1	1	3	4	3	4	1	1	1	2	3	2	2	3	2	2	3	1	1	2	2	3	4	3
166	101	1	44	1	1	11	1	1	4	3	4	1	2	1	1	2	2	1	1	3		2	5	4	2	2	3	2	2	1	3	2	1	1	4	2	2	1	1	2	2	3	2	2	2	1	1	2	1
167	74	2	34	2	2	1	4	2	1	2	2	1	2	1	3	2	2	1	2	2		3	2	5	3	2	2	2	3	2	4	2	4	2	2	1	2	2	3	2	1	1	2	3	2	1	1	1	2
168	68	1	65	1	2	1	4	1	2	2	4	1	2	1	2	1	3	1	1	2		2	3	4	2	3	2	2	2	3	1	2	1	3	3	2	1	2	2	2	1	1	3	3	1	2	2	2	2
169	358	1	33	1	3	12	1	2	4	1	3	1	1	1	1	1	1	1	1	1		1	1	1	1	1	1	3	2	2	3	2	3	2	3	3	3	3	2	1	3	2	3	3	1	1	1	4	1
170	487	1	33	1	1	12	3	2	4	1	3	1	1	1	1	1	1	1	1	1		1	1	1	1	1	1	4	1	4	4	2	2	1	1	1	1	2	4	2	1	1	3	1	2	1	1	5	1
171	73	1	56	2	2	1	4	2	2	3	5	2	1	2	1	3	2	1	3	2		2	3	3	2	2	5	3	2	3	3	2	2	3	1	1	1	4	3	3	2	2	3	3	2	3	2	3	2
172	727	1	65	1	1	1	1	2	2	1	2	2	2	1	2	1	1	1	3	2		1	2	3	4	2	3	3	2	2	3	2	3	2	3	3	3	3	2	2	3	2	2	2	2	3	3	3	3
173	232	2	62	1	1	1	2	2	2	1	1	2	1	1	1	1	1	1	1	1		1	1	1	1	1	1	1	1	1	1	1	1	1	1	1	1	1	1	1	1	1	1	1	1	1	1	1	1
174	140	2	50	2	3	1	3	2	2	1	2	2	1	1	2	2	1	1	1	1		1	1	1	1	1	1	3	2	3	3	2	3	3	3	3	3	3	3	3	3	3	3	3	3	3	4	4	4
175	284	1	41	1	1	1	2	2	4	1	1	2	1	1	2	3	1	2	1	3		1	1	2	2	3	1	3	3	4	4	4	4	3	3	3	3	3	3	4	4	4	4	4	2	2	2	2	2
176	173	2	77	1	1	1	1	2	4	1	2	1	2	1	1	1	1	1	1	1		1	1	1	1	1	1	1	3	1	1	4	4	4	4	2	2	4	4	3	4	3	4	2	2	3	3	3	3
177	84	1	56	2	2	1	3	2	4	2	4	1	2	1	2	1	3	1	2	2		2	2	3	5	4	3	2	3	2	2	2	3	1	1	1	2	2	1	4	2	2	3	3	2	2	1	2	2
178	194	2	90	2	2	10	3	1	4	1	2	2	1	1	1	1	1	2	2	1		2	2	3	1	3	1	2	3	1	3	2	1	1	2	2	2	2	2	2	1	1	2	1	3	1	3	2	3
179	537	2	75	1	1	10	1	2	2	1	4	2	2	2	1	2	2	2	2	3		3	3	2	2	2	2	2	2	2	2	3	2	2	2	2	3	3	2	2	2	2	3	3	2	2	2	3	2
180	552	1	43	1	1	1	2	2	4	1	1	2	3	2	2	2	3	3	3	3		3	3	2	2	3	2	3	2	2	3	3	3	3	3	2	3	3	2	2	3	3	3	3	3	4	3	3	4
181	183	1	60	1	1	1	2	2	4	1	5	1	2	1	2	2	2	1	2	2		1	2	3	2	2	3	3	3	2	2	2	2	2	3	2	3	2	3	2	3	2	3	2	2	2	2	3	3
182	123	1	56	1	1	1	2	2	1	1	5	1	2	2	1	2	2	1	2	2		2	2	3	2	3	2	3	3	3	2	3	2	2	2	3	3	2	2	2	3	2	2	3	3	2	2	3	2
183	119	2	66	1	2	10	2	2	4	1	5	1	1	2	1	2	1	2	2	1		3	2	2	3	3	2	3	2	3	2	3	3	2	2	3	3	2	3	3	2	3	2	3	2	2	3	3	2
184	219	2	57	1	2	12	1	2	4	1	1	2	1	2	2	2	1	2	2	2		3	2	2	2	3	2	2	3	2	2	2	2	3	2	2	3	3	2	3	3	2	2	2	2	3	2	3	2
185	119	1	62	2	3	1	2	2	4	1	1	2	2	1	2	1	2	2	1	1		2	3	2	2	3	2	2	3	3	2	3	2	3	3	2	3	2	3	3	3	2	2	3	2	3	2	3	2
186	147	1	50	2	2	1	3	2	4	1	5	1	1	2	1	1	1	1	1	1		1	3	2	2	2	2	3	2	2	2	3	3	3	3	3	2	2	2	3	2	3	3	3	1	1	1	1	1
187	135	1	56	1	1	1	2	2	2	1	4	1	2	2	2	2	2	2	2	2		2	3	3	3	3	3	2	2	2	2	2	2	2	2	2	2	2	2	3	2	2	2	2	2	2	2	3	1
188	93	1	54	1	2	10	2	2	4	1	1	1	2	1	2	1	2	1	2	1		2	3	3	2	3	2	2	3	2	3	3	2	3	2	2	3	2	3	2	3	2	3	3	2	3	2	3	3
189	155	2	50	2	2	1	3	2	4	1	4	1	2	2	2	2	2	2	2	2		2	2	2	2	2	2	2	2	2	2	2	2	2	2	2	2	2	2	3	2	2	3	3	3	3	2	2	3
190	75	1	19	1	1	1	1	1	4	1	1	2	1	3	2	2	3	3	2	2		1	1	1	1	1	1	1	1	1	1	1	1	1	1	1	1	1	1	1	1	1	1	1	1	1	1	1	1
191	147	1	40	1	2	1	2	2	4	1	1	1	2	1	2	2	1	2	1	2		3	2	3	3	2	3	2	3	3	2	3	2	2	2	3	2	3	2	3	2	2	3	2	3	2	2	3	3
192	195	1	19	1	2	1	2	1	4	3	5	2	3	3	3	3	3	3	3	3		2	2	2	2	2	2	2	2	2	2	2	2	2	2	2	2	2	2	2	2	2	2	2	2	2	2	2	2
193	91	1	45	2	2	1	2	2	4	1	1	2	2	1	2	2	2	1	2	1		2	3	2	3	2	3	2	2	2	3	2	3	2	3	2	2	3	3	2	3	3	2	2	2	3	2	3	3
194	169	2	50	1	1	1	2	2	4	1	5	1	2	2	2	2	2	2	2	2		2	2	2	2	2	2	2	2	2	2	2	2	2	2	2	2	2	2	2	2	2	2	3	2	2	2	2	2
195	97	2	53	2	2	1	2	2	4	1	4	1	2	2	2	2	2	2	2	2		2	2	2	2	2	2	2	2	2	2	2	2	2	2	2	2	2	2	2	2	2	2	3	3	3	3	3	3
196	99	2	68	1	1	12	1	1	4	1	5	1	2	2	2	2	2	2	2	2		3	3	3	3	3	3	2	2	2	2	2	2	2	2	2	2	2	2	2	2	2	2	2	2	3	2	3	2
197	100	2	68	1	1	1	1	1	4	1	5	1	2	2	2	2	2	2	2	2		2	2	3	3	3	2	2	2	2	2	2	2	2	2	2	2	2	2	2	2	2	2	2	3	3	3	3	2
198	82	2	50	2	2	1	2	2	4	1	1	2	2	1	2	2	1	2	2	1		3	2	3	2	3	2	2	3	3	2	3	2	3	3	2	2	3	3	2	3	3	2	3	2	3	2	3	2
199	262	2	60	1	2	1	2	2	1	1	5	1	2	2	2	2	2	2	2	2		3	3	3	2	2	2	2	2	3	3	2	2	2	2	3	3	3	3	3	3	3	3	3	3	3	3	3	2
200	79	2	36	2	3	1	2	2	4	1	1	1	2	1	2	2	1	2	2	1		3	2	3	3	2	3	2	3	3	2	3	3	2	3	2	2	3	2	2	3	2	3	2	2	3	3	2	3
201	2513	2	50	1	1	1	2	2	2	1	5	1	1	1	2	1	2	1	2	2		2	2	3	1	2	2	3	2	2	2	2	2	2	2	2	2	2	2	2	2	2	2	3	3	3	3	3	3
202	115	2	72	1	1	1	1	1	4	1	5	1	2	2	2	2	2	2	2	2		2	2	2	2	2	2	2	2	2	2	2	2	2	2	2	2	2	2	2	2	2	2	2	2	3	2	2	2
203	95	1	70	1	1	11	1	1	1	1	5	1	2	2	2	2	2	2	2	2		2	2	2	2	2	2	2	2	2	2	2	2	2	2	2	2	2	2	2	2	2	2	2	2	3	2	2	2
204	94	1	28	2	3	1	2	1	4	1	1	1	2	1	2	2	2	1	2	2		3	2	3	2	3	2	3	2	3	2	3	2	2	2	2	2	2	2	2	2	2	2	2	2	3	2	3	2
205	374	1	53	1	1	1	2	2	2	3	1	2	1	1	1	1	1	1	1	1		1	1	1	1	1	1	1	1	1	1	1	1	1	1	1	1	1	1	3	2	2	3	3	1	1	1	5	1
206	387	1	62	1	1	1	3	2	4	1	1	2	1	1	1	1	1	1	1	1		1	1	1	1	1	1	1	1	1	1	1	1	2	2	1	1	1	1	1	1	1	1	1	1	1	1	1	1
207	228	2	72	1	1	1	2	1	2	1	2	2	3	2	2	2	3	2	2	2		2	2	2	2	3	2	2	3	2	2	1	2	3	3	2	2	2	2	2	2	2	3	3	2	2	2	2	2
208	211	1	53	1	3	1	2	2	4	1	1	2	1	1	1	1	1	1	1	1		1	1	1	1	1	1	1	1	1	2	1	2	2	3	2	2	3	2	2	2	1	1	2	1	1	1	4	1
209	343	1	23	1	3	1	3	1	2	1	1	2	2	2	2	2	2	2	2	3		1	2	1	1	2	1	3	3	2	3	2	3	3	3	3	3	3	3	3	3	3	3	3	2	3	2	4	2
210	913	2	66	1	1	12	2	2	2	1	5	1	1	1	1	1	1	1	1	1		1	3	1	3	3	2	2	2	3	3	2	2	2	3	2	2	3	3	2	2	2	3	2	1	1	1	5	1
211	367	1	36	1	2	1	4	2	4	1	1	2	3	2	2	2	3	3	3	3		2	3	1	3	2	2	1	1	1	1	1	1	1	1	1	1	1	1	3	3	3	3	3	1	1	1	5	1
212	371	1	63	1	1	12	1	2	4	1	1	1	2	2	1	1	2	2	2	2		1	2	1	2	2	1	3	3	2	3	2	3	3	3	3	2	3	3	3	2	2	3	2	2	2	2	3	2
213	628	2	59	1	1	1	2	2	2	1	5	2	3	2	2	2	2	2	2	2		2	2	2	2	2	1	3	2	3	3	1	2	2	2	3	2	3	3	3	2	2	3	2	2	1	1	2	1
214	202	2	65	2	3	1	3	1	2	1	4	1	2	2	2	1	1	1	1	2		1	3	2	2	2	3	2	2	2	2	2	2	2	2	2	2	2	2	3	2	2	2	2	2	2	2	2	2
215	2986	2	68	2	2	1	3	2	2	1	5	1	1	1	1	1	1	1	1	1		1	1	1	1	1	1	1	1	1	1	1	1	1	1	1	1	1	1	1	1	1	1	1	1	1	1	4	1
216	179	1	55	1	1	12	1	2	4	1	5	1	2	2	2	2	2	2	2	2		2	2	2	2	2	2	3	3	3	3	3	3	3	3	3	3	3	3	3	3	3	3	3	3	3	3	3	3
218	133	2	40	2	2	1	2	2	4	1	1	1	2	2	1	2	2	2	1	2		3	2	2	3	2	3	3	4	3	4	3	4	3	3	3	4	3	4	3	4	4	3	3	4	3	3	3	4
219	223	1	68	2	1	12	3	2	1	1	1	1	2	2	3	1	1	1	1	1		1	1	1	1	1	1	2	1	2	1	2	3	3	3	3	3	3	3	3	3	3	3	3	3	2	1	3	1
222	378	1	60	1	1	11	1	2	4	1	4	2	2	2	2	2	2	2	2	2		3	3	3	3	3	3	2	2	2	2	2	2	2	2	2	2	2	2	2	2	2	2	2	3	3	3	3	3
223	149	1	33	2	1	11	1	2	4	1	1	2	1	1	1	1	1	1	1	1		1	1	1	1	1	1	4	4	4	4	4	4	4	4	4	4	4	4	4	4	4	4	4	1	1	1	1	1
224	124	1	50	2	3	10	3	2	4	1	1	1	2	1	2	1	2	1	2	1		2	3	2	3	2	2	3	4	4	3	4	3	3	4	3	4	3	4	3	4	3	4	3	3	2	3	4	3
225	639	2	40	1	1	1	2	2	2	1	1	2	2	1	3	3	3	3	3	3		3	2	2	2	2	2	2	3	3	2	2	2	2	3	2	3	3	2	3	2	2	3	2	4	2	4	4	3
226	530	1	34	2	2	1	4	2	4	1	1	2	2	2	2	2	2	1	2	3		2	2	1	2	3	2	3	2	3	3	2	2	2	3	3	2	2	3	2	2	2	3	3	2	1	1	5	1
229	390	1	42	1	2	1	1	2	4	1	1	2	2	2	2	2	2	2	2	2		2	3	2	3	3	3	2	3	3	3	2	3	2	3	3	3	3	3	3	2	3	3	3	3	3	3	3	2
232	556	2	71	1	1	11	2	2	2	1	1	2	3	2	1	1	1	1	1	3		2	2	1	1	2	1	3	2	3	3	2	3	3	3	3	2	2	3	3	2	2	3	3	2	1	1	4	1
235	121	2	56	2	3	1	4	2	4	1	1	2	2	2	2	2	2	2	2	2		1	1	1	1	1	1	1	1	1	1	1	1	1	1	1	2	2	3	1	3	3	1	3	4	1	1	4	4
236	1045	1	45	1	1	11	2	2	5	1	1	2	1	1	1	1	2	1	1	1		1	1	1	1	1	1	1	1	2	2	2	3	3	2	2	3	3	3	3	3	2	3	3	2	1	2	5	2
237	231	2	35	2	3	1	2	2	2	1	1	1	1	1	2	2	2	2	1	1		2	2	2	2	1	1	3	3	3	3	1	3	1	1	3	3	3	3	2	2	2	2	2	1	2	1	2	1
[truncated: 50 more columns]
